# Supplementary material
Source: PubMed Central journal article supplement (PMC6233300)
Supplement: NIHMS990920-supplement-5.pdf [file NIHMS990920-supplement-5.pdf]

Special Issue: Biomarkers of Substance Abuse

## Opinion

## Defining Substance Use Disorders: The Need for Peripheral Biomarkers

Kristopher J. Bough<sup>1,\*</sup> and Jonathan D. Pollock<sup>1</sup>

**Addiction is a brain disease, and current diagnostic criteria for substance use disorders (SUDs) are qualitative. Nevertheless, scientific advances are beginning to characterize neurobiological domains. Combining multiple units of measure may provide an opportunity to deconstruct the heterogeneities of a SUD and define endophenotypes by using peripheral biospecimens. There are several recent examples of potential biomarker types that can be examined, together with their categorical applications for SUDs. We propose that, in conjunction with rapidly advancing statistical and mathematical modeling techniques, there is now a unique opportunity for the discovery of composite biomarkers within specific domains of addiction; these may lay the foundation for future biomarker qualification, with important implications for drug development and medical care.**

### Redefining the Diagnosis of Substance Abuse Disorders

Addiction can be defined as a chronic, relapsing brain disease characterized by compulsive drug-seeking and use despite self-destructive consequences. As a disease, addiction alters both brain structure and function. Each year more than 90 000 individuals die from drug and alcohol abuse, and more than 475 000 from tobacco use [1]. Moreover, drug abuse is estimated to cost the USA more than \$740 billion annually, resulting from a wide range of health (e.g., mental illness, heart disease, cancer) and societal consequences (e.g., crime) [2].

SUDs are currently diagnosed using several psychosocial outcome measures under a single **construct** (see [Glossary](#)). A SUD is defined as the 'recurrent use of alcohol and/or drugs that cause clinically and functionally significant impairment, such as health problems, disability, and failure to meet major responsibilities at work, school, or home' and is diagnosed qualitatively as a 'mild', 'moderate', or 'severe' [3]. Diagnoses are based upon the number of symptomatic criteria a person exhibits; symptoms include, for example, impaired control, risky use, drug-seeking, and withdrawal [4].

While existing criteria are clinically useful, they are based on self-report and lack scientific rigor. They do not incorporate any of the underlying neurobiological or neurobehavioral factors of addiction. Like most diseases, each SUD is heterogeneous, and factors such as genetics, age and gender differences, drug or polydrug abuse, stage of addiction, and the presence of a comorbid disorder such as depression all contribute in varying degrees to a final diagnosis [5]. Unfortunately, these heterogeneities are not sufficiently captured. Consequently, validated analytical platforms that can more accurately capture the (phase-specific) varieties of a SUD are needed.

To address these issues, the addictions neuroclinical assessment (ANA) was proposed in 2016 to better understand stage-dependent heterogeneities and redefine **addiction nosology** ([Box](#)

### Highlights

Peripheral biomarker discovery may be facilitated by leveraging a neuroscience-based diagnostic framework such as the addictions neuroclinical assessment.

The easy and cost-efficient collection of peripheral tissue samples, which leverage well-defined genetic, epigenetic, proteomic, metabolomic, and related assay platforms, can markedly improve the discovery of a composite biomarker for SUDs.

Rapidly evolving statistical methodologies – such as Bayesian statistical and random forest models – may facilitate and validate biomarker discovery; these techniques may also provide new opportunities for an enhanced understanding of pathophysiological and pharmacodynamic aspects of SUDs.

<sup>1</sup>National Institutes of Health (NIH), National Institute on Drug Abuse (NIDA), Rockville, MD 20852, USA

\*Correspondence: [boughk@nih.gov](mailto:boughk@nih.gov) (K.J. Bough).

## Box 1. Useful Definitions for SUD Investigations

**Assessment:** the interpretation or the evaluation of the measurement.

**Biomarker applications:** a biomarker(s) can be used in a variety of settings, including basic research, drug development, and/or clinical practice.

**Clinical outcome assessments:** a clinical assessment of how a patient feels, functions, or survives.

**Context of use (CoU):** a CoU is a statement that fully and clearly describes the purpose of use of a biomarker.

**Endpoint (correlative):** a precisely defined variable that is intended to reflect an outcome of interest that is statistically analyzed to address a particular research question. A precise definition of an endpoint typically specifies the type of assessments made, the timing of those assessments, the assessment tools used, and possibly other applicable details such as how multiple assessments within an individual are to be combined.

**Need statement:** a concise and coherent description of the knowledge gap or drug development need (e.g., improved diagnostic tool) that a biomarker program plans to address. It lays out the evidence that defines the potential CoU and the cognate risk–benefit ratio. This in turn prioritizes a potential biomarker for future (development) qualification.

**Types of biomarkers:** physiologic, genomic, metabolic, immunologic, histologic, or radiographic assessments are types of biomarkers.

1). This assessment tool is broken down into three domains: (i) **incentive salience**, (ii) **negative emotionality**, and (iii) **executive function** [6]. Each domain is further subdivided to incorporate various stages of addiction based upon both preclinical and clinical findings. For example, the negative emotionality domain can incorporate the physical dependence stage of the disease, whereas the incentive salience domain would incorporate the binge/intoxication stage of the disease [6,7]. Subunits of measure, such as molecular (e.g., dopamine, DA) or cellular (e.g., ventral tegmental area DA cells) measures, can then be used to subcharacterize a stage of addiction such as binge/intoxication [8]. If one or more of these objective submeasures can be assigned to domain-specific circuitry and/or other clinical outcomes such as self-report, neurobehavior (e.g., **delayed discounting** [9]), and/or psychosocial symptoms, heterogeneities within each stage of addiction could then be significantly deconstructed and endophenotypes defined. We posit that this may not only lead to the elucidation of mechanism(s) of action for SUDs but might also lay the groundwork for future discovery and **qualification** of an objective measure – or **biomarker** – to endophenotypically diagnose substages of addiction (e.g., relapse, withdrawal).

### Current SUD Biomarkers

Current SUD Biomarkers are used to detect a drug and/or its metabolite(s). These measures can determine when and how much drug an individual may have recently consumed (minutes to days) and are based upon pharmacokinetic (PK) differences. Substances can be measured in urine, blood, saliva, breath, or hair samples. These **recency-of-use** biomarkers have four main uses [10–14]. First, the quantitative assessment of a drug within a specified time-range can serve as a toxicity biomarker to legally determine, for example, accidental death due to opioid-related overdose. Second, a recency-of-use measure can be used to differentiate frequent versus occasional drug use in non-chronic users [13]. Third, a recency-of-use measure can be used to evaluate the level of intoxication due to binge drug use. This would be especially important if a **point-of-care device** for workplace or roadside testing could be developed to assess marijuana-induced impairment. Finally, a recency-of-use biomarker can serve in a monitoring capacity. For instance, when measured serially, blood concentrations of an addictive drug may be used to assess abstinence and compliance [15]. As an example, an

### Glossary<sup>a</sup>

**Addiction nosology:** a classification scheme within addiction medicine that delineates the components of a substance use disorder (SUD).

**Biomarker:** a defined characteristic measured as an indicator of normal biological processes, pathogenic processes, or responses to an exposure or intervention, including therapeutic interventions. Molecular, histologic, radiographic, and physiologic characteristics are types of biomarkers. A biomarker is not an assessment of how an individual feels, functions, or survives.

Categories of biomarkers include indicators of susceptibility/risk and diagnostic, monitoring, prognostic, predictive, pharmacodynamic, and/or safety indicators.

**Composite biomarker**

**(biosignature):** a composite biomarker consists of several individual biomarkers that are combined in a stated algorithm to reach a single interpretive readout.

**Construct:** the assemblage of neurologically defined elements such as working memory, long-term memory, executive control, social/emotional processing, attention, and perception.

**Delayed discounting:** the cognitive process that evaluates the selection of a smaller, more immediate reward over a larger, more delayed reward [9].

**Dorsal anterior cingulate cortex (dACC)–striatal coupling:**

neurocircuitry which may be used to distinguish responses during reward anticipation versus reward receipt.

**Executive function:** processes related to attention, perception, response inhibition, behavioral flexibility, planning, cognitive control, working memory, and the valuation of future events [6].

**Incentive salience:** a type of motivation created in the brain by an association between a stimulus and reward. In response to a cue associated with the reward, the individual is compelled to act [6].

**Negative emotionality:** processes related to anger, irritability, contempt, disgust, guilt, fear, dysphoria, and hypohedonia.

**Point-of-care device:** a device that is designed to be used at or near where the patient is located.

absence of the cocaine metabolite benzoylecgonine in human blood or urine over time can be used to indicate abstinence [16]. Because all potential SUD therapeutics must first demonstrate abstinence to receive FDA regulatory approval, a recency-of-use biomarker in this category can serve as a lynchpin for the development of putative novel treatments.

Additional biomarkers are needed beyond measures of recent drug exposure. There is an urgent need for biomarkers that can, for example, diagnose the severity of drug dependence, monitor therapeutic efficacy, or predict treatment response. In addition, because small-molecule therapies for central nervous system (CNS) disorders have a success rate of only ~7%, and require 35% longer than non-CNS drugs to receive US regulatory approval [17], the discovery of a biomarker, of almost any category, could indispensably enhance the development of desperately needed, safe, and effective therapeutics for SUDs. Perhaps most significantly, the discovery of a **prodromal marker** might be used to prevent the development of addiction (risk, prognostic) or delay the onset or relapse (prognostic), although this has yet to be determined.

### The Time Is Right for Peripheral Biomarkers

Current CNS markers, although powerful, are costly (e.g., magnetic resonance imaging, MRI; positron-emission tomography, PET) and/or invasive (e.g., cerebrospinal fluid analyses). PET imaging may require the codevelopment of novel radioligands, a bottleneck for the study of disease-related changes in the brain. Moreover, access to postmortem brain tissue is limited, and conducting standardized assays of postmortem samples is difficult because tissue collection and processing vary widely [18]. Overall, issues with assay standardization and generalizability, as well as small sample sizes, all hinder the discovery of biomarkers via direct CNS measures.

By comparison, peripheral tissue samples (e.g., blood, saliva, urine) are easily harvested, less invasive, inexpensive, and are more suitable for banking. Accordingly, this would allow the collection of samples taken across multiple tissues and at several timepoints from large numbers of unique patient populations. Assays of peripheral biospecimens also lend themselves to standardized collection, processing, measurements, and analysis, all necessary features of biomarker development. Perhaps most significantly, however, there is growing evidence that peripheral markers of several types (e.g., miRNAs, metabolites) [19–22] or neural cells derived from human induced pluripotent stem cells (iPSCs) [23] may reflect CNS pathophysiology. For example, evidence now indicates that miRNAs found in peripheral blood can differentiate patients with mild cognitive disorder from patients with Alzheimer's disease [24]. Taken together, applications of advanced technologies and methodologies using peripheral samples may enable biomarker discovery, elucidate the pathophysiological networks underlying separate stages of addiction, and define specific SUD endophenotypes, especially where units of measure can be collectively evaluated within the ANA framework (Table 1).

### Improved Statistical/Data Analytical Methodologies

How can we assemble all these data? Quantitative systems pharmacology (QSP) holds great promise in this regard. QSP combines systems biology with PK/pharmacodynamic modeling to integrate complex multivariate data (e.g., genetic, metabolic, physiologic, or pharmacologic), and iterative computations may greatly enable biomarker discovery [25]. QSP-related approaches can also be used to analyze transitions between disease states (e.g., Boolean methods) or to evaluate timecourse relationships between variables (e.g., ordinary differential equations) [26]. In terms of SUDs, these methodologies will be especially valuable for existing tobacco-related datasets. For example, when the genetic *CHRNA5* and *CYP2A6* allelic variants

**Prodromal marker:** a biomarker that could be used to detect the initial symptoms before the full development of a SUD.

**Qualification:** this term has different scientific and regulatory meanings.

Generally, qualification is an evidentiary process of linking a biomarker with biological processes and clinical endpoints that is intended to establish whether the biomarker is fit for a specific purpose. For example, the use of a prognostic imaging biomarker might be used to distinguish patients that are more likely to exhibit a clinical response, thereby decreasing the heterogeneities found within a study population and increasing the power and efficiency of a clinical trial.

**Recency of use:** time transpired since last use (substance).

<sup>a</sup>Glossary adapted from [[30],[33],[34]].

Table 1. Biomarker Summary Table for SUDs<sup>a</sup>

| Candidate(s) biomarkers                                         | Biomarker category                     | Biomarker type (approach) | Biospecimen                                       | Assay(s)                     | ANA-based SUD domain(s) | Correlative phenotypic assay (s)                                                                                                | Possible context of use statement                                                                                                                                                                             |
|-----------------------------------------------------------------|----------------------------------------|---------------------------|---------------------------------------------------|------------------------------|-------------------------|---------------------------------------------------------------------------------------------------------------------------------|---------------------------------------------------------------------------------------------------------------------------------------------------------------------------------------------------------------|
| Alcohol [35–37]                                                 |                                        |                           |                                                   |                              |                         |                                                                                                                                 |                                                                                                                                                                                                               |
| Acetaldehyde-induced DNA adduct <i>N</i> <sup>2</sup> -ethyl-dG | Diagnostic, monitoring, prognostic     | Epigenetic                | Blood, epithelial cells (digestive tract or lung) | MS                           | IC/NE                   | AUDIT, AUDIT-C                                                                                                                  | (i) AUD patient identification<br>(ii) Qualitative diagnostic marker of dependence<br>(iii) Prognostic marker to identify potential for relapse in patients with AUD                                          |
| Aldehyde-induced DNA adduct 8-OH-dG                             | Safety, PD                             | Epigenetic                | Blood                                             | ELISA                        | EF                      | AUDIT, AUDIT-C, radiological scan                                                                                               | (i) Estimate toxicity associated with alcohol consumption<br>(ii) Assess DNA damage after alcohol consumption                                                                                                 |
| Aldehyde-induced protein adducts                                | Diagnostic, monitoring, prognostic, PD | Proteomic                 | Blood tissue                                      | MS, ELISA                    | IC/NE/EF                | Radiological scan, biopsy, neurological screening                                                                               | (i) Diagnostic nose-tissue specific alcohol-induced complications<br>(ii) Monitor alcohol use<br>(iii) May be used as an endpoint to assess AUD-treatment efficacy and optimize dosing                        |
| <i>ALDH2</i>                                                    | Susceptibility/risk                    | Genetic                   | Any (genetic)                                     | Sequencing                   | NE/EF                   | Alcohol challenge or patch test                                                                                                 | Variants of the <i>ALDH2</i> gene ( <i>ALDH2*1</i> , <i>ALDH2*2</i> ) can be used to determine susceptibility/risk of acetaldehyde-induced carcinogenesis for patients with AUD                               |
| Liver enzymes <sup>b</sup> , MCV, and CDT                       | Susceptibility/risk, diagnostic        | Serum                     | Blood                                             | Metabolic panel, blood count | EF                      | AUDIT, AUDIT-C, radiological scan                                                                                               | Traditional biomarkers used to support phenotypic assay results                                                                                                                                               |
| Blunted HPA                                                     | Susceptibility/risk                    | Metabolic                 | Saliva                                            | ELISA                        | IC/NE                   | (i) DSM-V for dependence<br>(ii) Behavioral tests for IS, NEM, EC (e.g., DD)<br>(iii) Self-report measures for sadness or anger | (i) A blunted (qualitative) salivary alpha-amylase PLUS<br>(ii) Blunted Cortisol level in saliva (males)<br>Can indicate a greater risk for developing AUD (may be correlated with rsFC of hypoactivated DMN) |
| HRV                                                             | Diagnostic                             | Physiologic               | ECG                                               | HRV                          | IC/NE/EF                | Drug craving, anxiety test                                                                                                      | A decreased HRV can indicate an AUD and could be used to stratify patients (may also be correlated with rsFC of hypoactivated DMN)                                                                            |
| <i>MOR</i> genotype                                             | PD                                     | Genetic (SNP)             | Blood                                             | PCR genotyping               | IC/NE/EF                | % Heavy drinking days and abstinence in patients treated with naltrexone or placebo                                             | rs1799971 G-carriers may be used to assess the efficacy of opioid receptor antagonists (e.g., naltrexone) versus placebo [38]                                                                                 |
|                                                                 | Diagnostic                             | Epigenetic                | Blood                                             | 450 K array                  | NA                      | DSM-V for AUD                                                                                                                   |                                                                                                                                                                                                               |

Table 1. (continued)

| Candidate(s) biomarkers                                          | Biomarker category     | Biomarker type (approach)            | Biospecimen                 | Assay(s)                                                                          | ANA-based SUD domain(s) | Correlative phenotypic assay (s)                                                                 | Possible context of use statement                                                                                                                                                                                              |
|------------------------------------------------------------------|------------------------|--------------------------------------|-----------------------------|-----------------------------------------------------------------------------------|-------------------------|--------------------------------------------------------------------------------------------------|--------------------------------------------------------------------------------------------------------------------------------------------------------------------------------------------------------------------------------|
| DNA methylation of <i>POMC</i>                                   |                        |                                      |                             |                                                                                   |                         |                                                                                                  | Increased DNA methylation at two CG dinucleotides in the <i>POMC</i> locus may indicate the presence of an AUD and be used to stratify patients for study [39]                                                                 |
| MOR binding                                                      | Monitoring             | Receptor binding                     | Brain                       | PET scan [ <sup>11</sup> C]-carfentanil                                           | IC                      | DSM-V for AUD, alcohol dependence scale                                                          | Elevated MOR availability in ventral striatum may be used to assess the severity of craving following 5 weeks of abstinence                                                                                                    |
| MOR and DOR binding                                              | Diagnostic             | Receptor binding                     | Brain                       | PET scan [ <sup>11</sup> C]-carfentanil and [ <sup>11</sup> C]-methyl-naltrindole | IC                      | DSM-V for AUD, alcohol dependence scale                                                          | Elevated MOR availability can be used to identify patients with an AUD                                                                                                                                                         |
| MOR PET scan and MOR expression                                  | Diagnostic, predictive | Receptor binding and gene expression | Brain                       | [ <sup>11</sup> C]-carfentanil PET scan plus qPCR plus receptor autoradiograph    | IC/NE                   | DSM-V for AUD, OCDS, structured assessment of the genetics of alcoholism                         | Low MOR-binding can be used to quantitatively diagnose the severity may be used to predict the lack of efficacy for an opioid antagonist (e.g., naltrexone) in AUD patients [40]                                               |
| (i) Basal cortisol response PLUS<br>(ii) Stress-induced cortisol | PD                     | Physiologic plus metabolites         | ECG, blood [cortisol] (RIA) | Response to stress                                                                | IC/NE                   | Negative mood, anxiety, and drug craving tests                                                   | (i) A restoration of previously reduced basal cortisol response PLUS<br>(ii) Increased stress-induced cortisol response<br>May be used to assess the efficacy of $\alpha$ 1 adrenergic antagonists (e.g., doxazosin, prazosin) |
| Disrupted tonic/phasic VmPFC activation                          | Diagnostic             | Neural                               | Brain                       | fMRI                                                                              | IC/EF                   | Neurobehavioral tests for working memory, response inhibition                                    | (i) VmPFC hyperactivation in the neutral state PLUS<br>(ii) VmPFC hypoactivation during stress<br>May be used to indicate the likelihood of relapse in AUD during abstinence                                                   |
| Cannabis [41]                                                    |                        |                                      |                             |                                                                                   |                         |                                                                                                  |                                                                                                                                                                                                                                |
| $\Delta$ 9-THC                                                   | Safety/toxicity        | Metabolites                          | Blood, Saliva               | GC/MS, LC-MS/MS                                                                   | EC                      | (i) Impaired operation of an automobile<br>(ii) Accidents in the home or workplace               | May be used to assess the level of impairment resulting from THC exposure/intoxication                                                                                                                                         |
| (i) $\Delta$ 9 –THC<br>(ii) Cannabinol<br>(iii) Cannabidiol      | Monitoring             | Metabolites                          | Blood                       | GC/MS, LC-MS/MS                                                                   | IC/EC                   | (i) DSM-V for CUD<br>(ii) Neurobehavioral tests for working memory, delayed discounting, craving | Repeated blood concentrations of THC, cannabinol, and cannabidiol over time can be used to identify and monitor the development of a CUD                                                                                       |

Table 1. (continued)

| Candidate(s) biomarkers                                                                                                                             | Biomarker category | Biomarker type (approach) | Biospecimen   | Assay(s)                                 | ANA-based SUD domain(s) | Correlative phenotypic assay (s)                                                                        | Possible context of use statement                                                                                                                                                                                             |
|-----------------------------------------------------------------------------------------------------------------------------------------------------|--------------------|---------------------------|---------------|------------------------------------------|-------------------------|---------------------------------------------------------------------------------------------------------|-------------------------------------------------------------------------------------------------------------------------------------------------------------------------------------------------------------------------------|
|                                                                                                                                                     |                    |                           |               |                                          |                         | (iii) Self-report test for recent drug use                                                              |                                                                                                                                                                                                                               |
| (i) $\Delta 9$ -THC<br>(ii) Cannabinol<br>(iii) Cannabidiol                                                                                         | PD                 | Metabolites               | Blood         | GC/MS, LC-MS/MS                          | IC/EC/NE                | Self-report test for recent drug use (e.g., alcohol, smoking, and substance involvement screening test) | Absence of THC, cannabinol, cannabidiol detected in the blood can be used to assess therapeutic efficacy by abstinence (and compliance with treatment)                                                                        |
| Cocaine [36,37]                                                                                                                                     |                    |                           |               |                                          |                         |                                                                                                         |                                                                                                                                                                                                                               |
| (i) HR<br>(ii) HF-HRV response<br>(iii) Benzoyllecgonine                                                                                            | PD, Monitoring     | Physiologic, metabolites  | ECG, Urine    | HF-HRV, HRV; GC-MS/MS or immunoassay     | IC/EN/EF                | DSM-V for dependence; behavioral tests for IS, NE, EC (e.g., DD); reduced cocaine usage (self-report)   | (i) Restoration of normal HR and HF-HRV response<br>PLUS<br>(ii) Improved abstinence measures (e.g., urine benzoyllecgonine absence)<br>Can indicate $\alpha 1$ -adrenergic antagonist therapeutic efficacy (e.g., doxazosin) |
| (i) <i>N</i> -methyl-serotonin<br>(ii) Guanine<br>PLUS<br>(iii) Hypoxanthine<br>(iv) Anthranilate<br>(v) Xanthine                                   | Diagnostic         | Metabolites               | Human Plasma  | LC-EC array platform                     | IC/NE/EF                | DSM-V for dependence; behavioral tests for IS, NE, EC (e.g., DD)                                        | (i) Significantly higher levels of <i>n</i> -methyl-serotonin and guanine<br>PLUS<br>(ii) Lower concentrations of hypoxanthine, anthranilate, and xanthine<br>Can identify patients with CUD [42]                             |
| MOR binding                                                                                                                                         | Prognostic         | Receptor binding          | Brain         | PET scan [ $^{11}\text{C}$ ]-carfentanil | IC                      | DSM-V for CUD, addiction severity index                                                                 | Increased brain MOR binding in frontal and temporal cortical regions can predict risk for relapse                                                                                                                             |
| Methamphetamine [37]                                                                                                                                |                    |                           |               |                                          |                         |                                                                                                         |                                                                                                                                                                                                                               |
| (i) $\alpha 1$ -Acid glycoprotein<br>(ii) Transthyretin<br>(iii) Complement factor H<br>(iv) Apolipoprotein L1<br>(v) Haptoglobin                   | Diagnostic         | Metabolic (proteins)      | Serum (human) | 2-DE, MS                                 | IC/NE/EF                | DSM-V for MUD; behavioral tests for IS, NE, EC (e.g., DD)                                               | An upregulation of all five of these proteins can identify patients with MUD [43]                                                                                                                                             |
| Opioids [36,37]                                                                                                                                     |                    |                           |               |                                          |                         |                                                                                                         |                                                                                                                                                                                                                               |
| (i) <i>N</i> -methylserotonin<br>(ii) $\alpha$ - and $\gamma$ -tocopherol<br>(iii) Guanine<br>(iv) Xanthosine<br>(v) Guanosine<br>(vi) Hypoxanthine | Diagnostic         | Metabolites               | Human plasma  | LCECA metabolomics platform              | IC/NE/EF                | DSM-V for OUD; behavioral tests for IS, NE, EC (e.g., DD)                                               | (i) Higher levels of <i>N</i> -methylserotonin, $\alpha$ - and $\gamma$ -tocopherol, guanine, xanthosine<br>PLUS<br>(ii) Lower levels of guanosine and hypoxanthine<br>Can identify patients with OUD [44]                    |

Table 1. (continued)

| Candidate(s) biomarkers                | Biomarker category    | Biomarker type (approach) | Biospecimen                       | Assay(s)                                                                         | ANA-based SUD domain(s) | Correlative phenotypic assay (s)                                                                                                  | Possible context of use statement                                                                                                                                                                                          |
|----------------------------------------|-----------------------|---------------------------|-----------------------------------|----------------------------------------------------------------------------------|-------------------------|-----------------------------------------------------------------------------------------------------------------------------------|----------------------------------------------------------------------------------------------------------------------------------------------------------------------------------------------------------------------------|
| <i>MOR</i> genotype                    | Predictive            | Genetic (SNP)             | Blood, saliva, immortalized cells | Illumina HumanOmni1-Quad_V1.0 microarray or Illumina human core exome microarray | NA                      | Opioid dosing schedules in methadone replacement therapy                                                                          | The presence of the rs73568641 SNP (300 kb upstream of <i>MOR</i> ) can predict optimal opiate dosage schedules <sup>c</sup> [45]                                                                                          |
| <i>MOR</i> genotype                    | Diagnostic            | Genetic (SNP)             | Blood                             | Illumina HumanOmni1-Quad                                                         | NA                      | Heroin injection drug users                                                                                                       | Four SNPs in <i>MOR</i> intron 1 associate with OUD <sup>c</sup> [46]                                                                                                                                                      |
| DNA methylation of <i>MOR</i>          | Diagnostic            | Epigenetic                | Blood                             | BS plus Sanger/pyrosequencing                                                    | NA                      | DSM-V for OUD                                                                                                                     | Increased DNA methylation in the <i>MOR</i> promoter of patients with OUD [47–49]                                                                                                                                          |
| DNA methylation of <i>MOR</i>          | Diagnostic            | Epigenetic                | Blood                             | (i) Methylation-specific PCR<br>(ii) BS plus Sanger                              | NA                      | DSM-V for OUD                                                                                                                     | Increased DNA methylation in the <i>MOR</i> promoter of patients with OUD [50]                                                                                                                                             |
| Heroin [36]                            |                       |                           |                                   |                                                                                  |                         |                                                                                                                                   |                                                                                                                                                                                                                            |
| <i>MOR</i> genotype                    | Prognosis, predictive | Genetic (SNP)             | ND                                | TaqMan or restriction fragment length polymorphism                               | IC/NE                   | (i) DSM-V for OUD<br>(ii) Adjective checklist reflecting opioid agonist effects to classify as negative or positive effect of use | SNP biosignature can predict heroin-induced subjective response <sup>c</sup> [51]                                                                                                                                          |
| <i>MOR</i> expression                  | Diagnostic            | Gene expression           | Brain                             | Microarray plus nanostring                                                       | NA                      | DSM-V for AUD                                                                                                                     | Decreased <i>MOR</i> expression in the striatum [52]                                                                                                                                                                       |
| <i>MOR</i> and DOR expression          | Diagnostic            | Gene expression           | Blood                             | qPCR                                                                             | NA                      | DSM-V for AUD                                                                                                                     | Decreased <i>MOR</i> and DOR expression in peripheral blood lymphocytes [52]                                                                                                                                               |
| Nicotine (smoking) [36,37,53]          |                       |                           |                                   |                                                                                  |                         |                                                                                                                                   |                                                                                                                                                                                                                            |
| Alkyl-DHAP plus lipid metabolite panel | Diagnostic            | Proteins plus metabolites | Human serum                       | ESI-tandem MS/MS                                                                 | IC/NE/EF                | DSM-V for dependence; behavioral tests for IS, NE, EC (e.g., DD)                                                                  | (i) Upregulated lipid metabolite panel (20 total)<br>PLUS<br>(ii) Three decreased acyl-alkyl-phosphatidylcholines<br>PLUS<br>(iii) Ratio of plasmalogens to diacyl-phosphatidylcholines<br>Can indicate smokers with a NUD |
| Alkyl-DHAP enzyme                      | Susceptibility/risk   | Proteins (enzyme)         | Human serum                       | ESI-tandem MS/MS                                                                 | IC/NE/EF                | Alzheimer disease assessment scale – cognitive behavioral test                                                                    | Reduced or lack of activity of the enzyme alkyl-DHAP can indicate the presence of a plasmalogen-deficiency disorder in smokers with a NUD [54]                                                                             |
| Alkyl-DHAP                             | PD                    | Proteins (enzyme)         | Human serum                       | ESI-tandem MS/MS                                                                 | IC/NE/EF                | (i) Behavioral tests for IS, NE, EC (e.g., DD)<br>(ii) Restoration of normal striatal activity                                    | Activation of this enzyme may provide and indicator for therapeutic efficacy [54]                                                                                                                                          |

Table 1. (continued)

| Candidate(s) biomarkers                   | Biomarker category                     | Biomarker type (approach) | Biospecimen           | Assay(s)         | ANA-based SUD domain(s)                     | Correlative phenotypic assay (s)                                           | Possible context of use statement                                                                                                                                                                           |
|-------------------------------------------|----------------------------------------|---------------------------|-----------------------|------------------|---------------------------------------------|----------------------------------------------------------------------------|-------------------------------------------------------------------------------------------------------------------------------------------------------------------------------------------------------------|
| (i) Bilirubin<br>(ii) Scyllo-inositol     | Safety/toxicity, prognostic            | Metabolites               | Human blood           | U-HPLC; GC-MS/MS | IC/NE/EF                                    | Cigarettes per day                                                         | (i) Lower levels of bilirubin PLUS<br>(ii) A lower circulating scyllo-inositol<br>Can indicate a risk factor for the development of smoking-related cancer [55]                                             |
| Striatal hypoactivity                     | Diagnostic                             | Neuroimaging              | Striatal and dACC     | rsFC (fMRI)      | IC/EF                                       | Cigarettes per day                                                         | NUD patient selection – quantitative assessment of dependence                                                                                                                                               |
| Striatal hypoactivity                     | Prognostic                             | Neuroimaging              | Striatal and dACC     | rsFC (fMRI)      | EF                                          | Craving measure                                                            | Potential indicator for NUD time relapse (i.e., time to relapse and severity)                                                                                                                               |
| Striatal hypoactivity                     | PD                                     | Neuroimaging              | Striatal and dACC     | rsFC             | EF (reward anticipation)                    | NRT or varenicline                                                         | NUD patient response to therapeutic or assessment of efficacy for a new NUD treatment                                                                                                                       |
| Striatal hypoactivity                     | Diagnostic, Prognostic                 | Neuroimaging              | Striatal and dACC     | rsFC             | IC (reward receipt)                         | FTND (negative)                                                            | (i) NUD patient selection – quantitative assessment of dependence<br>(ii) Patient stratification                                                                                                            |
| Striatal hypoactivity                     | Diagnostic, Prognostic                 | Neuroimaging              | Striatal and dACC     | fMRI (MID task)  | IC/EC (reward anticipation)                 | FTND (negative)                                                            | (i) NUD patient stratification<br>(ii) Risk for relapse                                                                                                                                                     |
| Striatal hypoactivity                     | Susceptibility/risk                    | Neuroimaging              | Striatal and dACC     | fMRI (MID task)  | IC, executive control (reward anticipation) | Reduced striatal activity                                                  | Possible indicator of a vulnerability risk factor for addiction in adolescents                                                                                                                              |
| Striatum-centered functional connectivity | Diagnostic, monitoring, prognostic, PD | Neuroimaging              | Striatum and dACC     | rsFC             | IC/NE                                       | (i) FTND (negative)<br>(ii) No response to nicotine or varenicline         | (i) NUD patient stratification<br>(ii) Long-term relapse<br>(iii) Non-response to NRT or varenicline efficacy<br>Can identify individuals with a NUD and assess the efficacy of a non-nicotinic therapeutic |
| Insula-centered functional connectivity   | Monitoring, prognostic                 | Neuroimaging              | Insula, amygdala, DMN | rsFC             | NE/EF                                       | (i) Response to NRT or varenicline<br>(ii) Self-report withdrawal symptoms | Can be used to identify individuals with a NUD and assess their risk for short-term relapse                                                                                                                 |
| Blunted ACTH and cortisol                 | Diagnostic                             | Metabolites               | Blood                 | ELISA            | NE                                          | Behavioral tests of NE (e.g., Beck anxiety inventory)                      | Blunted ACTH and cortisol levels in smokers is indicative of WD (may be correlated with rsFC of hypoactivated DMN)                                                                                          |
| HF-HRV                                    | Susceptibility/risk, diagnostic        | Physiologic               | ECG                   | ECG              | IC                                          | Anxiety tests, FTND drug craving                                           | (i) A blunted stress-induced HF-HRV can indicate both a greater risk to develop a NUD, or:<br>(ii) Quantitative assessment of                                                                               |



Table 1. (continued)

| Candidate(s) biomarkers       | Biomarker category | Biomarker type (approach)       | Biospecimen     | Assay(s)                                                   | ANA-based SUD domain(s) | Correlative phenotypic assay (s)                                                                           | Possible context of use statement                                              |
|-------------------------------|--------------------|---------------------------------|-----------------|------------------------------------------------------------|-------------------------|------------------------------------------------------------------------------------------------------------|--------------------------------------------------------------------------------|
|                               |                    |                                 |                 |                                                            |                         |                                                                                                            | dependence (may be correlated with rsFC of hypoactivated DMN)                  |
| Tobacco [36]                  |                    |                                 |                 |                                                            |                         |                                                                                                            |                                                                                |
| MOR PET scan                  | Diagnostic         | Receptor binding                | Brain           | [ <sup>11</sup> C]-carfentanil PET scan                    | IC/NE                   | (i) DSM-V for NUD<br>(ii) FTND<br>(iii) Expired CO levels                                                  | Correlations between behavioral effects of smoking and changes in MOR [56]     |
| MOR PET scan and MOR genotype | Predictive         | Receptor binding and genotyping | Brain and blood | [ <sup>11</sup> C]-carfentanil PET scan and PCR genotyping | IC                      | (i) Current smokers WD symptom checklist<br>(ii) Cigarette evaluation scale<br>(iii) Sensory questionnaire | Association of the MOR A118G variant with nicotine reinforcement in women [57] |

<sup>a</sup>Abbreviations: 2-DE, two-dimensional gel electrophoresis; ALDH2, aldehyde dehydrogenase 2; alkyl-DHAP, alkyl-dihydroxyacetonephosphate; AUD, alcohol use disorder; AUDIT, alcohol use disorders identification test; AUDIT-C, abbreviated AUDIT (three questions); BS, bisulfite; CDT, carbohydrate-deficient transferrin; CO, carbon monoxide; CUD, cocaine use disorder; CUD, cannabis use disorder; dACC, dorsal anterior cingulate cortex; DD, delayed discounting; DMN, default mode network; DOR,  $\delta$ -opioid receptor; DSM-V, *Diagnostic and Statistical Manual of Mental Disorders* (5th edn); EC, executive function; ECG, electrocardiogram; ELISA, enzyme-linked immunosorbent assay; ESI–tandem MS/MS, electrospray ionization in tandem with MS/MS; fMRI, functional magnetic resonance imaging; FTND, Fagerström test for nicotine dependence; GC, gas chromatography; HF-HRV, high frequency heart-rate variability; HPA, hypothalamus–pituitary–adrenal axis; HRV, heart-rate variability; IC, incentive salience; KOR,  $\kappa$ -opioid receptor; LC, liquid chromatography; LCECA, liquid chromatography–electrochemistry array metabolomics platform; MCV, mean corpuscular volume; MID, monetary incentive delay; MOR,  $\mu$ -opioid receptor; MS, mass spectrometry; MUD, methamphetamine use disorder; NA, not applicable; ND, not determined; NE, negative emotionality; NRT, nicotine replacement therapy; NUD, nicotine use disorder; OCDS, obsessive-compulsive drinking scale; OUD, opioid use disorder; PD, pharmacodynamic; PET, positron emission tomography; POMC, pro-opiomelanocortin; qPCR, quantitative PCR; rsFC, resting state functional connectivity; SNP, single-nucleotide polymorphism; THC,  $\Delta^9$ -tetrahydrocannabinol; TUD, tobacco use disorder; WD, withdrawal.

<sup>b</sup>Includes  $\gamma$ -glutamyl transpeptidase, lactate dehydrogenase, alkaline phosphatases, aminotransferases, and bilirubin.

<sup>c</sup>An association was found [46] between the rs3778150-C SNP within the *MOR1* intron and heroin addiction. Association of the A118G allele of the  $\mu$ -opioid receptor was only found when placed on the haplotype background containing the rs3778150-C SNP within the *MOR1* intron. This result might explain the inconsistent association of A118G allele of the  $\mu$ -opioid receptor with opioid use disorder.

Key Figure

A Biomarker for Substance Use Disorders (SUDs): Tobacco Is Our Best Example

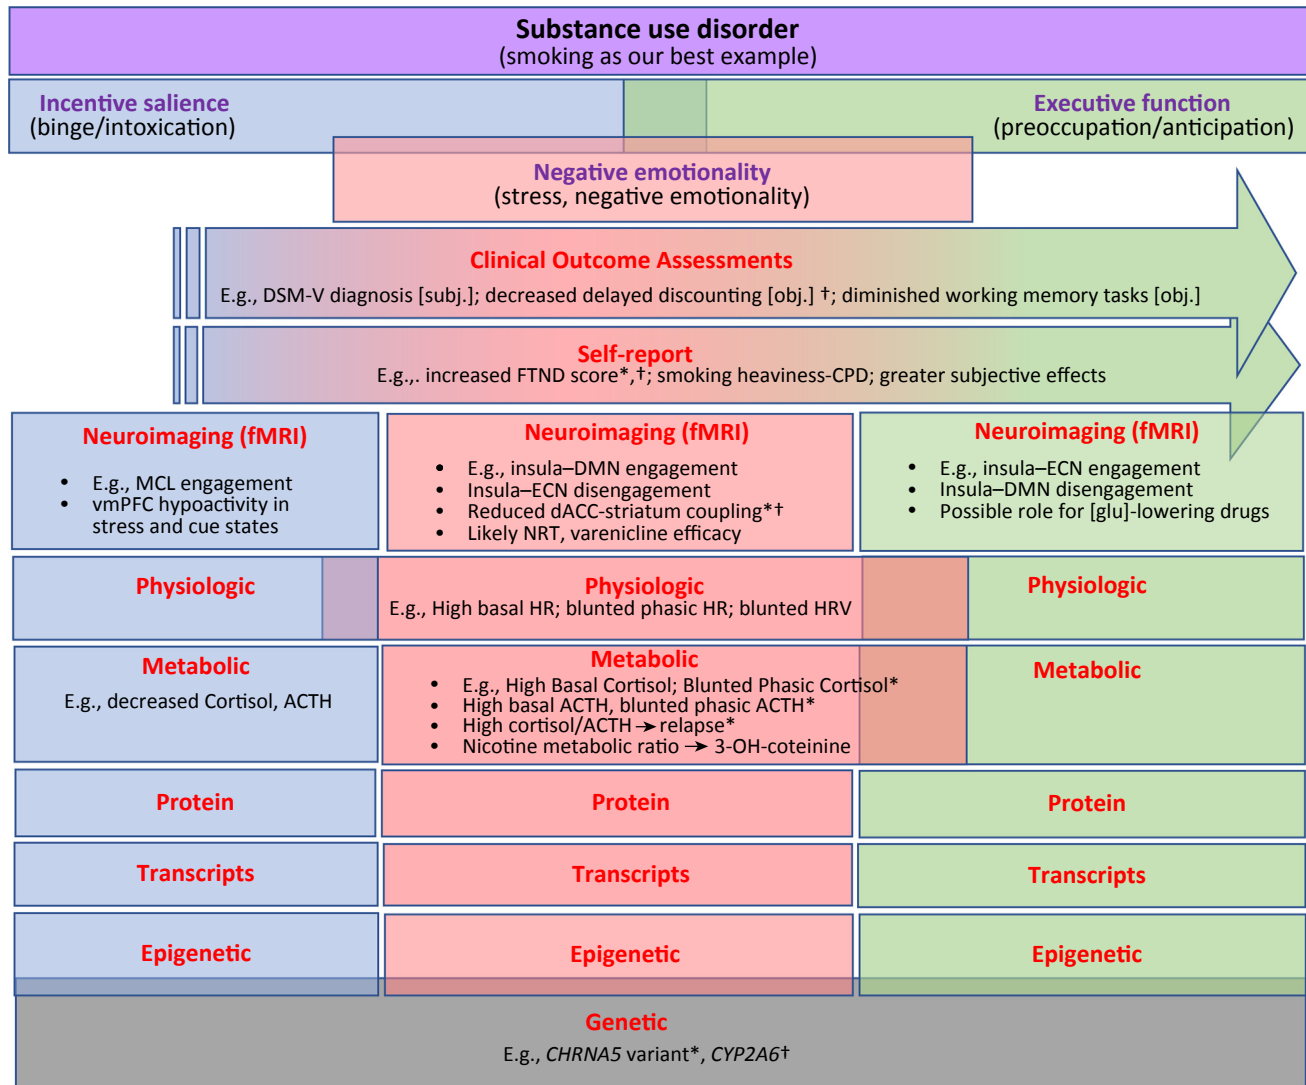

Trends in Molecular Medicine

**Figure 1.** Biomarkers related to nicotine use disorder (NUD) provide our best candidates for future qualification and clinical utility. When assessed together, the (i) genetic *CHRNA5* and *CYP2A6* allelic variants; (ii) metabolic high basal cortisol and adrenocorticotropic hormone (ACTH); (iii) physiologic high basal heart rate (HR), blunted phasic heart rate, blunted heart-rate variability (HRV); and (iv) nicotine metabolic ratio can identify a NUD and quantitatively determine the level of dependence [e.g., smoking heaviness (CPD)] [27]. This composite biomarker can also provide an estimate for the time to- and severity of a potential relapse. These measures can be linked to neuroimaging findings [e.g., insula–default-mode network (DMN) engagement, reduced **dorsal anterior cingulate cortex (dACC)–striatum coupling**]; neurobehavioral tests (e.g., decreased delayed discounting, diminished working memory tasks); and self-report [e.g., negative Fagerström test for nicotine dependence (FTND) score, DSM-V diagnosis for a NUD]. When all these units of assessment (genetic, metabolic, protein, etc.) are combined within a neurobiologically defined domain, a composite biomarker is more likely to reflect an underlying causal network within that domain, which can powerfully identify a SUD subtype and tease apart associated heterogeneities. Combined data may enhance the discovery of novel biomarker candidates and may also be used to uncover fundamental mechanisms applicable to multiple SUDs. The next step of biomarker development will be to standardize and validate biomarker assays, as has been demonstrated for the nicotine metabolic ratio. There is strong evidence for a composite biomarker that can (i) identify a NUD (diagnostic), (ii) quantitatively assess the level of dependence (diagnostic),

(Figure legend continued at the bottom of the next page.)

and nicotine metabolic ratio are evaluated together they can identify a nicotine use disorder and quantitatively determine the level of dependence (Figure 1, Key Figure) [27]. Bayesian techniques have already been used to quantitatively correlate genetic data with measures of nicotine metabolism, smoking outcome measures, and the prediction of optimal smoking-cessation treatment assignment [28,29]. This **composite biomarker** may also provide an estimate for the time to- and severity of a potential relapse. Leveraging heterogeneous datasets, the use of evolving data-mining and statistical techniques is now poised to identify and validate a robust composite biomarker for SUDs, in many cases utilizing data collected from peripheral biospecimens.

### Enabling Biomarker Discovery Processes

Improved biomarker definitions [15] and FDA regulatory pathways for the discovery and qualification of future biomarkers have now been well described [30]. Presently, the FDA offers regulatory guidance to submitters wanting to qualify a putative biomarker through their letter-of-intent program [31]; the latter concurrently establishes conjoint approval for both the US FDA and the European Medicines Agency. Altogether, the pathway to biomarker qualification has now been clarified, and this will hopefully allow for less arduous advancement into the clinic.

### Concluding Remarks

Within the past 2 years a new neurobiologically based framework for SUDs has been described that uses a combination of neuroimaging and behavioral assessments [6]. From this, the incorporation of distinct units of measure – which can be taken from peripheral biospecimens – is poised to elucidate the phase-specific underpinnings of SUDs. Information that is collectively assembled and validated using behavioral, epidemiological, and/or neuroimaging data may permit the discovery of a composite, peripheral biomarker which can objectively deconstruct the heterogeneities of SUDs (see Outstanding Questions). Thus, the application of a composite biomarker may provide an actionable tool that could be used for drug development (e.g., diagnostic measure for patient stratification) and objectively diagnose addiction [32].

### References

- Centers for Disease Control (2017) *Smoking and Tobacco Use*, CDC
- National Institute on Drug Abuse (2017) *Trends and Statistics*, NIDA
- American Psychiatric Association (2013) *Diagnostic and Statistical Manual of Mental Disorders*. (5th edn), APA
- Hasin, D.S. *et al.* (2013) DSM-5 criteria for substance use disorders: recommendations and rationale. *Am. J. Psychiatry* 170, 834–851
- Volkow, N.D. *et al.* (2015) Biomarkers in substance use disorders. *ACS Chem. Neurosci.* 6, 522–525
- Kwako, L.E. *et al.* (2016) Addictions neuroclinical assessment: a neuroscience-based framework for addictive disorders. *Biol. Psychiatry* 80, 179–189
- Volkow, N.D. and Morales, M. (2015) The brain on drugs: from reward to addiction. *Cell* 162, 712–725
- National Institute for Mental Health (2017) *Research Domain Criteria (RDoC)*, NIMH
- Bickel, W.K. *et al.* (2014) The behavioral- and neuro-economic process of temporal discounting: a candidate behavioral marker of addiction. *Neuropharmacology* 76, 518–527
- Diao, X. and Huestis, M.A. (2017) Approaches, challenges, and advances in metabolism of new synthetic cannabinoids and identification of optimal urinary marker metabolites. *Clin. Pharmacol. Ther.* 101, 239–253
- Karschner, E.L. *et al.* (2009) Do Delta9-tetrahydrocannabinol concentrations indicate recent use in chronic cannabis users? *Addiction* 104, 2041–2048
- Karschner, E.L. *et al.* (2009) Implications of plasma delta9-tetrahydrocannabinol, 11-hydroxy-THC, and 11-nor-9-carboxy-THC concentrations in chronic cannabis smokers. *J. Anal. Toxicol.* 33, 469–477
- Karschner, E.L. *et al.* (2012) Predictive model accuracy in estimating last delta9-tetrahydrocannabinol (THC) intake from plasma and whole blood cannabinoid concentrations in chronic, daily cannabis smokers administered subchronic oral THC. *Drug Alcohol Depend.* 125, 313–319
- Scheidweiler, K.B. *et al.* (2016) Quantification of cannabinoids and their free and glucuronide metabolites in whole blood by disposable pipette extraction and liquid chromatography-tandem mass spectrometry. *J. Chromatogr. A* 1453, 34–42

### Outstanding Questions

Where are the opportunities to begin to coalesce these types of biomarker data? When and how do we correlate them to clinical endpoints, and to which clinical endpoints?

Given the large amount of existing data surrounding smoking, should an initial focus be placed on smoking research because it might serve as an exemplar for future biomarker discovery surrounding other SUDs? Alternatively, given the current opioid crisis, should all efforts be aimed at biomarkers for pain? If so, what 'pain population' should be prioritized?

Are there biomarkers that distinguish opioid dependence from addiction? Can we identify biomarkers associated with drug craving that can predict relapse in abstinent users, and not those in withdrawal?

Is there a specific assay that should be used for peripheral biomarker discovery? Alternatively, should an effort be made to standardize 2–3 assay platforms to enable the discovery of a standard composite biomarker for each domain and substage of a SUD?

(iii) forecast the possibility for relapse (prognostic), and (iv) determine optimal treatment response (predictive). Abbreviations: CPD, cigarettes per day; ECN, executive control network; fMRI, functional magnetic resonance imaging; glu, glutamate; MCL, mesocorticolimbic circuitry; NRT, nicotine replacement therapy; obj, objective; subj, subjective; vmPFC, ventral medial prefrontal cortex; \*, measures directly correlated to *CHRNA5* allelic variant; †, measures directly correlated to *CYP2A6* variant.

15. FDA-NIH Biomarker Working Group (2016) *BEST (Biomarkers, Endpoints, and other Tools) Resource*, National Institutes of Health and the FDA
16. Schmitz, J.M. *et al.* (2014) A two-phased screening paradigm for evaluating candidate medications for cocaine cessation or relapse prevention: modafinil, levodopa-carbidopa, naltrexone. *Drug Alcohol Depend.* 136, 100–107
17. Tufts Center for the Study of Drug Development (2014) *Impact Report: CNS Drugs Take Longer To Develop, Have Lower Success Rates, than Other Drugs*, TCDD
18. Lewis, D.A. (2002) The human brain revisited: opportunities and challenges in postmortem studies of psychiatric disorders. *Neuropsychopharmacology* 26, 143–154
19. Roozafzoon, R. *et al.* (2010) Expression of NMDA receptor subunits in human peripheral blood lymphocytes in opioid addiction. *Eur. J. Pharmacol.* 638, 29–32
20. Sinha, R. (2011) New findings on biological factors predicting addiction relapse vulnerability. *Curr. Psychiatry Rep.* 13, 398–405
21. Moreira, F.P. *et al.* (2016) Cocaine abuse and effects in the serum levels of cytokines IL-6 and IL-10. *Drug Alcohol Depend.* 158, 181–185
22. Palma-Alvarez, R.F. *et al.* (2017) Peripheral levels of BDNF and opiate-use disorder: literature review and update. *Rev. Neurosci.* 28, 499–508
23. Hayashi-Takagi, A. *et al.* (2014) Peripheral biomarkers revisited: integrative profiling of peripheral samples for psychiatric research. *Biol. Psychiatry* 75, 920–928
24. Wu, H.Z. *et al.* (2016) Circulating microRNAs as biomarkers of Alzheimer's disease: a systematic review. *J. Alzheimers Dis.* 49, 755–766
25. van der Graaf, P.H. and Benson, N. (2011) Systems pharmacology: bridging systems biology and pharmacokinetics-pharmacodynamics (PKPD) in drug discovery and development. *Pharm. Res.* 28, 1460–1464
26. Gadkar, K. *et al.* (2016) A six-stage workflow for robust application of systems pharmacology. *CPT Pharmacomet. Syst. Pharmacol.* 5, 235–249
27. Wassenaar, C.A. *et al.* (2011) Relationship between CYP2A6 and CHRNA5-CHRNA3-CHRNA4 variation and smoking behaviors and lung cancer risk. *J. Natl. Cancer Inst.* 103, 1342–1346
28. Bierut, X. and Tyndale, X. (2018) Title. *Trends Mol. Med.* 00, 000–000
29. Baurley, X. *et al.* (2018) Title. *Trends Mol. Med.* 00, 000–000
30. US Food and Drug Administration (2017) *Biomarker Qualification Program*, FDA
31. US Food and Drug Administration (2017) *Joint FDA/EMA Letter of Intent (LOI) Submissions for Biomarker and Clinical Outcome Assessment Qualification Programs*, FDA
32. Seyhan, A.A. (2010) *Biomarkers in Drug Discovery and Development. Translational Immunology, Inflammation and Immunology.*
33. US Food and Drug Administration (2014) *Guidance for Industry and FDA Staff: Qualification Process for Drug Development Tools*, FDA
34. O'Connor, J.P. *et al.* (2017) Imaging biomarker roadmap for cancer studies. *Nat. Rev. Clin. Oncol.* 14, 169–186
35. Heymann, X. *et al.* (2018) Title. *Trends Mol. Med.* 00, 000–000
36. Belzeaux, X. *et al.* (2018) Title. *Trends Mol. Med.* 00, 000–000
37. Sinha, X. and Milivojevic, X. (2018) Title. *Trends Mol. Med.* 00, 000–000
38. Anton, R.F. *et al.* (2006) Combined pharmacotherapies and behavioral interventions for alcohol dependence: the COMBINE study: a randomized controlled trial. *JAMA* 295, 2003–2017
39. Zhang, H. *et al.* (2013) Array-based profiling of DNA methylation changes associated with alcohol dependence. *Alcohol. Clin. Exp. Res.* 37 (Suppl. 1), E108–E115
40. Hermann, D. *et al.* (2017) Low mu-opioid receptor status in alcohol dependence identified by combined positron emission tomography and post-mortem brain analysis. *Neuropsychopharmacology* 42, 606–614
41. Huestis, X. and Smith, X. (2018) Title. *Trends Mol. Med.* 00, 000–000
42. Patkar, A.A. *et al.* (2009) Alterations in tryptophan and purine metabolism in cocaine addiction: a metabolomic study. *Psychopharmacology* 206, 479–489
43. Shi, W.L. *et al.* (2012) Serum proteomics of methamphetamine addicts and up-regulation of complement factor H related to methamphetamine addiction. *Neurosci. Lett.* 525, 23–28
44. Mannelli, P. *et al.* (2009) Opioid use affects antioxidant activity and purine metabolism: preliminary results. *Hum. Psychopharmacol.* 24, 666–675
45. Smith, A.H. *et al.* (2017) Genome-wide association study of therapeutic opioid dosing identifies a novel locus upstream of OPRM1. *Mol. Psychiatry* 22, 346–352
46. Hancock, D.B. *et al.* (2015) Cis-expression quantitative trait loci mapping reveals replicable associations with heroin addiction in OPRM1. *Biol. Psychiatry* 78, 474–484
47. Nielsen, D.A. *et al.* (2009) Increased OPRM1 DNA methylation in lymphocytes of methadone-maintained former heroin addicts. *Neuropsychopharmacology* 34, 867–873
48. Doehring, A. *et al.* (2013) Chronic opioid use is associated with increased DNA methylation correlating with increased clinical pain. *Pain* 154, 15–23
49. Nielsen, D.A. *et al.* (2010) Ethnic diversity of DNA methylation in the OPRM1 promoter region in lymphocytes of heroin addicts. *Hum. Genet.* 127, 639–649
50. Ebrahimi, G. *et al.* (2017) Elevated levels of DNA methylation at the OPRM1 promoter region in men with opioid use disorder. *Am. J. Drug Alcohol Abuse* Published online January 24, 2017. <http://dx.doi.org/10.1080/00952990.2016.1275659>
51. Zhang, D. *et al.* (2007) Effect of mu-opioid receptor gene polymorphisms on heroin-induced subjective responses in a Chinese population. *Biol. Psychiatry* 61, 1244–1251
52. Sullivan, S.E. *et al.* (2013) ELK1 transcription factor linked to dysregulated striatal mu opioid receptor signaling network and OPRM1 polymorphism in human heroin abusers. *Biol. Psychiatry* 74, 511–519
53. Sutherland, X. and Stein, X. (2018) Title. *Trends Mol. Med.* 00, 000–000
54. Wang-Sattler, R. *et al.* (2008) Metabolic profiling reveals distinct variations linked to nicotine consumption in humans – first results from the KORA study. *PLoS One* 3, e3863
55. Gu, F. *et al.* (2016) Cigarette smoking behaviour and blood metabolomics. *Int. J. Epidemiol.* 45, 1421–1432
56. Scott, D.J. *et al.* (2007) Smoking modulation of mu-opioid and dopamine D2 receptor-mediated neurotransmission in humans. *Neuropsychopharmacology* 32, 450–457
57. Ray, R. *et al.* (2006) Association of OPRM1 A118G variant with the relative reinforcing value of nicotine. *Psychopharmacology* 188, 355–363
