# Supplementary material
Source: PubMed Central journal article supplement (PMC6233300)
Supplement: NIHMS990920-supplement-6.pdf [file NIHMS990920-supplement-6.pdf]

# Trends in Molecular Medicine

February 2018, Volume 24, Number 2, pp. 103–236

*Special Issue: Biomarkers of  
Substance Abuse*

## Editorial

- 103 **Finding the Roots: Molecularly Tracking Substance Addiction** Catarina Sacristán

## Spotlight

- 106 **HDAC5 Regulates the Formation of Drug Memories** *Alexander C.W. Smith and Paul J. Kenny*

## Opinions

- 109 **Defining Substance Use Disorders: The Need for Peripheral Biomarkers** *Kristopher J. Bough and Jonathan D. Pollock*
- 121 **Addiction Biomarkers: Dimensional Approaches to Understanding Addiction** *Laura E. Kwako, Warren K. Bickel, and David Goldman*
- 129 **Functional Neurocircuits and Neuroimaging Biomarkers of Tobacco Use Disorder** *Matthew T. Sutherland and Elliot A. Stein*
- 144 **Aldehyde-Induced DNA and Protein Adducts as Biomarker Tools for Alcohol Use Disorder** *Helen M. Heymann, Adriana M. Gardner, and Eric R. Gross*
- 156 **Cannabinoid Markers in Biological Fluids and Tissues: Revealing Intake** *Marilyn A. Huestis and Michael L. Smith*
- 173 **Central and Peripheral Biomarkers of Stress Response for Addiction Risk and Relapse Vulnerability** *Verica Milivojevic and Rajita Sinha*
- 187 **Preparing the Way: Exploiting Genomic Medicine to Stop Smoking** *Laura J. Bierut and Rachel F. Tyndale*
- 197 **Using Metabolomics to Investigate Biomarkers of Drug Addiction** *Reza Ghanbari and Susan Sumner*

## Editor

Catarina Sacristán

## Trends Senior Manager

Gail Teitzel

## Trends Publisher

Paige Shaklee

## Journal Manager

Margriet ten Napel

## Journal Administrators

Ria Otten

Patrick Scheffmann

## Advisory Editorial Board

Sudhir Agrawal

Karl Alitalo

Rajendra S. Apte

Helen Blau

Kay Davies

Ian Dunham

Alain Fischer

Fred Gage

Romina Goldszmid

David Gurwitz

Thirumala-Devi Kanneganti

Margaret A. Liu

Andrew McMichael

William A. Petri

Daniel Rader

Richard M. Ransohoff

David Sinclair

Claudio Soto

Caetano Reis e Sousa

Thierry Soussi

Jonathan S. Stamler

George C. Tsokos

David A. Tuveson

Jouni Uitto

Stephen Waxman

Johnathan Whetstone

(Contents continued )

- 206     **Focusing on the Opioid System  
for Addiction Biomarker Discovery**     *Raoul Belzeaux,  
Laurence Lalanne, Brigitte L. Kieffer,  
and Pierre-Eric Lutz*
- 221     **Biosignature Discovery for Substance  
Use Disorders Using Statistical  
Learning**     *James W. Baurley,  
Christopher S. McMahan,  
Carolyn M. Ervin, Bens Pardamean,  
and Andrew W. Bergen*

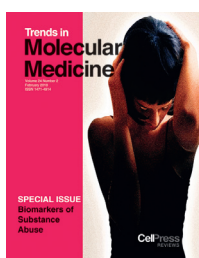

**On The Cover:** Our February special issue on “Biomarkers of Substance Abuse” explores recent advances on the molecular details and experimental approaches geared towards better identifying peripheral biomarkers of substance use disorders (SUDs). The timely collection brings together discussions on current methodology and data analytical tools for biomarker discovery and molecular targeting in alcohol, nicotine, marijuana, cocaine and opioid addiction. Cover illustration by istock/GeorgePeters; design by Catarina Sacristán.

**Editorial Inquiries**  
*Trends in Molecular Medicine*  
Cell Press  
50 Hampshire St, 5th Floor  
Cambridge, MA 02139, USA  
Tel: 617 386 2138  
E-mail: [tmm@cell.com](mailto:tmm@cell.com)

**CellPress**  
REVIEWS
