# Supplementary material
Source: PubMed Central journal article supplement (PMC6233300)
Supplement: NIHMS990920-supplement-12.pdf [file NIHMS990920-supplement-12.pdf]

Special Issue: Biomarkers of Substance Abuse

## Opinion

## Preparing the Way: Exploiting Genomic Medicine to Stop Smoking

Laura J. Bierut<sup>1,\*</sup> and Rachel F. Tyndale<sup>2</sup>

Clinical medicine of the future is poised to use an individual's genomic data to predict disease risk and guide clinical care. The treatment of cigarette smoking and tobacco use disorder represents a prime area for genomics implementation. The genes *CHRNA5* and *CYP2A6* are strong genomic contributors that alter the risk of heaviness of smoking, tobacco use disorder, and smoking-related diseases in humans. These biomarkers have proven analytical and clinical validity, and evidence for their clinical utility continues to grow. We propose that these biomarkers harbor the potential of enabling the identification of elevated disease risk in smokers, personalizing smoking cessation treatments, and motivating behavioral changes. We must prepare for the integration of genomic applications into clinical care of patients who smoke.

## Implementing Genomic Medicine – The Next Frontier

The large-scale implementation of genomic knowledge into healthcare represents the next challenge in clinical medicine. Recent efforts funded by the National Institutes of Health (e.g., the Precision Medicine Initiative, <https://allofus.nih.gov/>), the Centers for Disease Control and Prevention (e.g., the Public Health Genomics Knowledge Base, <https://phgkb.cdc.gov/PHGKB/phgHome.action?action=home>), as well as private companies such as 23andMe (<https://www.23andme.com>) are defining the research, practice, and policy backgrounds for large-scale, affordable genomics implementation. Although the majority of work to date has focused on using genomic information to identify risk of cancer and congenital diseases, next phases are expanding to a wider range of diseases and disorders, including aspects of behavioral medicine. In addition, an increasing focus on **pharmacogenomics** (see [Glossary](#)), where individual responses to specific drug treatments are tied to genomic variation, is the next frontier to personalized treatment.

The treatment of cigarette smoking and tobacco use disorder represents an appealing area for genomics implementation. **Genomic variation** characterizes a growing class of **biomarkers** that objectively measure characteristics that identify biological processes, pathological outcomes, or pharmacological responses. Genomic variation biomarkers underlie the **precision medicine** efforts to personalize approaches to disease prevention and treatment. We are on the cusp of implementing genomic testing into clinical care related to smoking behaviors given our knowledge of variation that predicts heaviness of cigarette smoking measured by cigarettes smoked per day, tobacco use disorder, smoking-related disease outcomes, and potentially, pharmacogenomic responses to smoking cessation medications.

Combustible cigarette smoking remains one of the foremost causes of preventable death in both industrialized and developing countries. In the US, >36 million people smoke cigarettes [1], and worldwide >1 billion use tobacco products (<http://www.who.int/gho/tobacco/use/en/>). Every

## Highlights

Advances in DNA sequencing technology and efforts such as the Precision Medicine Initiative are paving the way for the implementation of genomics into clinical medicine.

Variation in *CHRNA5*, the gene encoding the  $\alpha 5$  nicotinic acetylcholine receptor subunit, and *CYP2A6*, the gene encoding the primary enzyme that metabolizes nicotine, predict smoking heaviness, delayed smoking cessation, and risk for smoking-related diseases.

Despite diverse genomic backgrounds, the association between *CHRNA5* and *CYP2A6* genomic variation and smoking-related behaviors is seen in populations of European, Asian, and African descent.

Evidence is equivocal regarding the use of *CHRNA5* and *CYP2A6* to predict response to pharmacological treatment for smoking cessation. Adequately powered, prospective clinical and pharmacogenetics trials are thus needed.

<sup>1</sup>Department of Psychiatry, Washington University School of Medicine, St. Louis, MO, USA  
<sup>2</sup>Campbell Family Mental Health Research Institute, Centre for Addiction and Mental Health (CAMH) and Departments of Psychiatry, Pharmacology and Toxicology, University of Toronto, Toronto, M5S 1A8, Ontario, Canada

\*Correspondence: [laura@wustli.edu](mailto:laura@wustli.edu) (L.J. Bierut).

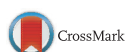

year, >480 000 people die in the US from tobacco-related illnesses [2], and >6 million people perish worldwide (<http://www.who.int/mediacentre/factsheets/fs339/en/>). Preventive strategies that regulate tobacco sales and tax tobacco products have significantly decreased smoking over the past 50 years [3]. Yet, in the US, 36 million people continue to smoke and 68% report wanting to quit, but only 7% of smokers successfully stop smoking each year [4]. The high addictiveness of nicotine and the ongoing large burden of smoking-related health effects motivate efforts to improve smoking cessation using novel approaches.

Self-reported cigarettes smoked per day is a commonly used and easily collected measure of combustible cigarette consumption [5]. Clinicians and researchers use self-reported cigarettes per day integrated over a lifetime history of smoking to estimate health risks for many cancers, chronic obstructive pulmonary disease, and other smoking-related diseases [6]. In addition to disease risk, smoking more cigarettes per day is correlated with greater dependence on nicotine, resulting in more difficulty with smoking cessation [7]. However, the number of cigarettes smoked does not fully capture the behavior of cigarette smoking; for instance, for the same number of cigarettes smoked, differences in the number of puffs inhaled per cigarette as well as the depth of inhalation can be profound [8,9]. It is common knowledge that for the same number of cigarettes smoked per day, some individuals are able to quit smoking and others struggle to quit. In addition, the effectiveness of our smoking cessation treatments is modest at best and ineffective for most people who smoke. Heritability estimates indicate that genomic variation drives many of these differences in smoking behaviors and smoking cessation between smokers [10–13]. This backdrop highlights the importance of developing new genomic biomarker tools to better predict outcomes related to combustible cigarette smoking and to promote smoking cessation. In this article, we discuss evidence of genomic variation contributing to smoking behaviors and propose the gaps that need to be filled to implement genomically informed smoking cessation.

### Genomic Contributors to Smoking Behaviors

We focus on two strong genomic contributors that alter the risk of heaviness of smoking and tobacco use disorder – variation in the genes encoding **nicotinic acetylcholine receptor subunits** and **nicotine metabolism enzymes**. We select these two genomic targets because of their robust connection with smoking heaviness, lung cancer, and chronic obstructive pulmonary disease in well-powered **genome-wide association studies** (GWASs), in addition to their biological plausibility, as described below. GWAS has unequivocally demonstrated that variation in **CHRNA5**, the gene encoding the  $\alpha 5$  nicotinic acetylcholine receptor (AChR) subunit, predicts smoking heaviness, later age of smoking cessation, lung cancer, chronic obstructive pulmonary disease, and early mortality (Table 1, Key Table) [13–24]. Similarly, variation in **CYP2A6**, the gene encoding the primary enzyme that metabolizes nicotine, also predicts heavier cigarette consumption, failed smoking cessation, and smoking-related illnesses, including hypertension and lung cancer (Table 1) [11,25–33]. These advances in our knowledge of genomic biomarkers associated with cigarette-smoking-related morbidity and mortality lay the foundation for genomic implementation to reduce smoking.

The first large genome-wide analysis of tobacco use disorder was conducted in 2007 and identified the **CHRNA5 single nucleotide polymorphism** (SNP), rs16969968, as being associated with an increasing risk for heaviness of smoking and tobacco use disorder [14,15]. Multiple independent groups subsequently confirmed the association between this variant and smoking-related phenotypes at a genome-wide significance level [16,20,34]. Research consortia performed a genome-wide association **meta-analysis** that included >73 000 subjects, and rs16969968 exhibited a highly significant association with cigarettes

### Glossary

**3'-hydroxycotinine (3HC):** product of CYP2A6 metabolism of the primary nicotine metabolite, cotinine.

**Analytic validity:** refers to how well a test predicts the presence or absence of a particular gene or genetic change.

**Biomarker:** biological measure found in blood, other body fluids, or tissues that is a sign of a normal or abnormal process, condition, or disease.

**Bupropion:** prescription medication (antidepressant of the aminoketone class) used to treat smoking by reducing the severity of craving and withdrawal symptoms.

**CHRNA5:** gene coding the  $\alpha 5$  subunit of nicotinic AChR subunit.

**Clinical utility:** refers to whether a test can provide information about diagnosis, treatment, or prevention of a disease that will be helpful to a consumer.

**Clinical validity:** refers to how well a genetic variant being analyzed is related to the presence, absence, or risk of a specific disease.

**Cotinine:** predominant metabolite of nicotine. Cotinine is used as a biomarker for exposure to nicotine in tobacco smoke.

**CYP2A6:** gene for the cytochrome P450 enzyme 2A6 that oxidizes nicotine to its inactive metabolite COT, and COT to 3HC.

**Genome-wide association study:** approach that involves rapidly scanning markers across complete sets of DNA/genomes, to find genomic variations associated with a particular disease.

**Genomic variation:** differences in the DNA sequence from one person to the next.

**Meta-analysis:** quantitative statistical analysis of several separate but similar studies in order to test the pooled data for statistical significance.

**Nicotine metabolism enzymes:** proteins that metabolize nicotine, the P450 enzyme 2A6 being a predominant enzyme.

**Nicotine metabolite ratio (NMR):** ratio of 3HC to COT, which correlates with nicotine clearance from the body and is used as a biomarker for CYP2A6 activity.

**Nicotine replacement therapy:** smoking cessation treatment that

## Key Table

Table 1. Diagnostic Biomarkers of Tobacco Use Disorders

| Biomarker        | Predictive ability                                                                                             | Risk                                                           | Limitations                                                                                                                        | Refs          |
|------------------|----------------------------------------------------------------------------------------------------------------|----------------------------------------------------------------|------------------------------------------------------------------------------------------------------------------------------------|---------------|
| <i>CHRNA5</i>    | Smoking heaviness<br>Later age of smoking cessation                                                            | Predictive of lung cancer, COPD <sup>a</sup> , early mortality | rs16969968 low frequency in African and Asian ancestry<br>Linkage disequilibrium structure differs across world populations        | [13–24]       |
| <i>CYP2A6</i>    | Smoking heaviness<br>Later age of smoking cessation                                                            | Predictive of lung cancer, COPD, hypertension                  | Difficult to genotype because of complex genetic architecture<br>Linkage disequilibrium structure differs across world populations | [11,25–30,33] |
| NMR <sup>a</sup> | Nicotine metabolism<br>Later age of smoking cessation<br>Smoking cessation with specific pharmacologic therapy |                                                                | Requires recent smoking                                                                                                            | [65–67]       |

<sup>a</sup>Abbreviations: NMR, nicotine metabolite ratio; COPD, chronic obstructive pulmonary disease.

smoked per day ( $P = 5.57 \times 10^{-72}$ ) [22]. Although the majority of this genomic research has been conducted with populations of European ancestry, additional studies have demonstrated that *CHRNA5* variation is associated with risk for heavy smoking in European, African, and Asian populations [35–37]. Across world populations, variation in *CHRNA5* is associated with altered susceptibility to tobacco use disorder.

Experimental studies have shown how this genomic variation functionally alters biological responses. The  $\alpha 5$  nicotinic AChR combines with other nicotinic subunits to form a pentameric receptor that binds nicotine [38]. The rs16969968 variant causes an amino acid change from aspartic acid to asparagine in the  $\alpha 5$  AChR subunit [39]. This amino acid change alters receptor function *in vitro*; functional studies indicate reduced receptor response to nicotinic agonists in cells expressing the rs16969968 asparagine coding variant versus the aspartic acid coding variant [40,41].

In parallel to this work, genomic variation in *CYP2A6*, the gene that encodes the primary enzyme cytochrome P450 2A6 (CYP2A6) that metabolizes nicotine, plays a role in heaviness of smoking and smoking-related illnesses [25,29,42,43]. Nicotine, the key addictive compound in tobacco, is metabolically inactivated by the hepatic enzyme, CYP2A6 to form **cotinine** (COT) and cotinine is further metabolized to **3'-hydroxycotinine** (3HC) exclusively by CYP2A6 [44,45]. *CYP2A6* is highly polymorphic and these genomic differences in turn lead to a large variation in rates of nicotine metabolism (from essentially inactive to very rapid) [27,46,47]. This interindividual variation in rates of metabolism of nicotine can contribute to differential addictive risk associated with nicotine intake [48]. Genetically fast metabolizers of nicotine are more likely to smoke more cigarettes per day, be dependent on nicotine, fail smoking cessation, and have a higher risk for smoking-related illnesses such as lung cancer [29,43,49–51].

This gene has complex genomic architecture with duplications and deletions, which challenges current genomic testing. Another measure of nicotine metabolism, the ratio of 3HC to COT, referred to as the **nicotine metabolite ratio** (NMR), has been developed as a validated

supplies a controlled amount of nicotine, but excludes other dangerous chemicals found in cigarettes.

**Nicotinic acetylcholine receptor:** receptor proteins that respond to the neurotransmitter acetylcholine. Nicotinic receptors also respond to drugs, including nicotine. They are found in the central and peripheral nervous system, muscle, and many other tissues.

**Pharmacogenomics:** study of inherited genetic differences in drug metabolic pathways which affect individual responses to drugs, both in terms of therapeutic effects and adverse effects.

**Precision medicine:** emerging approach for disease prevention and treatment that takes into account individual variability in genes, environment, and lifestyle for each person.

**Risk stratification:** tool to identify and predict which patients are likely to be at high risk and tailoring the management of their care in order to prevent worse outcomes.

**Single nucleotide polymorphism:** variation in a single base pair in a DNA sequence.

**Varenicline:** prescription medication used to treat smoking. It is a nicotinic receptor partial agonist – it stimulates nicotine receptors more weakly than nicotine itself.

indicator of genomic variation in *CYP2A6*, representing enzymatic activity in daily smokers (Table 1) [47,52,53]; it is also highly correlated to total nicotine clearance [47]. This measure was created in part to overcome the difficulty in testing genomic variation in *CYP2A6* due to numerous structural variants and high homology with adjacent genes *CYP2A7* and *CYP2A13* [47]. In addition, the NMR captures both genomic variation in *CYP2A6* as well as environmental factors such as other medication use (for example estrogen-containing hormonal therapy) that might influence nicotine metabolism [46]. Thus, genetic variation in both *CYP2A6* and *CHRNA5* create biologically plausible sources of variation in smoking behaviors; *CYP2A6* may alter the levels of nicotine for any given dose, and variation in the nicotinic receptor may alter the impact of the nicotine dose on downstream effects.

### Smoking Cessation

One of the strongest predictors of failed smoking cessation is the level of dependence on nicotine [7,54–56]. Genomic variation in *CHRNA5* and *CYP2A6* are among the strongest risk factors for heaviness of smoking and tobacco use disorder, and in turn, both of these genes are related to failed smoking cessation [11,13,51,57]. Variation in *CHRNA5* predicts a later age of smoking cessation at a population-based level, as well as failed smoking cessation during pregnancy [13,57]. Similarly, variation in *CYP2A6* is associated with differential success rates in smoking cessation [11,51].

Growing evidence indicates that *CHRNA5* variation is associated with responses to pharmacological treatment and success of pharmacotherapy for smoking cessation [10,58–61]. Pharmacogenomics is the use of genomic variation to predict the likelihood that a patient will successfully respond to pharmacological treatments. In the case of smoking cessation, there are three FDA-approved medications: **nicotine replacement therapy**, **varenicline**, and **bupropion**. Some studies report a genotype-by-treatment interaction, whereby those with high-risk genomic variants of *CHRNA5* are more predisposed to having difficulty quitting without treatment, and this genetic risk can be ameliorated by pharmacological treatment [10,12]. However, other studies have found no evidence of an association of variation in *CHRNA5* with smoking cessation, nor of a genotype-by-treatment interaction [62,63]. A Cochrane review of 18 smoking cessation trials investigated whether abstinence rates varied by genetically informed biomarkers (including *CHRNA5*) within pharmacotherapy treatment arms compared to placebo. The authors tentatively concluded that there may be a gene by treatment interaction for rs16969968, although there is notable heterogeneity between studies [64].

Further studies have examined the role that nicotine metabolism plays in smoking cessation. In general, smokers who are slower metabolizers identified by NMR, present greater quit rates in clinical trials in the placebo arm (consistent with increased spontaneous quitting seen in some studies), and under treatment with the nicotine patch [65,66]. Faster metabolizers exhibit better treatment responses on varenicline than with the nicotine patch (compared to slow metabolizers), with a more favorable side effect profile [67]. To date, only one prospectively genomically informed randomized clinical trial has been performed; randomization by NMR (and oversampling slow metabolizers) indicated that faster metabolizers exhibited better quit rates on varenicline versus patch, relative to slow metabolizers; slow metabolizers also presented a worsened side-effect profile for varenicline than faster metabolizers [67]. A key issue in the experimental design for these pharmacogenomics studies is the placebo or behavioral counseling treatment arm, as both genes have an influence on the cessation rate in the absence of pharmacotherapy, which can alter the interpretation of the intervention arm [51]. Further well-designed pharmacogenomics studies comprise a ripe area for investigation

moving forward, including conducting adequately powered, prospective clinical, pharmacogenetic smoking cessation trials. With high-quality, valid biomarkers, we may accelerate progress in personalizing treatment for smoking cessation.

### Introducing Genomic Evidence to Address Smoking

For genomic applications to enter clinical medicine, key questions should be answered to evaluate components of **analytic validity**, **clinical validity**, **clinical utility**, and ethical, legal, and social implications of a test.

#### Analytic Validity

Genomic testing for low frequency (0.5–5%) and common (>5%) variants produces highly reproducible results, indicating strong analytic validity; indeed, variation in *CHRNA5* can be measured accurately and reliably [68]. Direct genomic testing remains troublesome for variation in *CYP2A6* due to hybrid and copy number variants and high homology to *CYP2A7*, a pseudogene, although newer methods, including next-generation sequencing, and SNPs identified from GWASs of the NMR, appear to be alleviating this problem [69–72]. Thus, both these genomic regions qualify for analytic validity, if these methods are conducted properly.

The NMR, which captures enzymatic function of *CYP2A6*, has been extensively tested, demonstrating accuracy and reliability [53,73]. The relatively long half-life of COT and of 3HC enhance stability over time for COT and 3HC, as well as the resulting NMR, in daily smokers; this stability is evident in both heavy and light cigarette smokers and over different sampling time of day (reviewed in [53]). There is minimal variation in NMR over a 7-day period for daily smokers, and it remains stable over a 44-week range in regular daily smokers and in smokers who are reducing their smoking levels with the help of nicotine replacement therapy (NRT). Moreover, the NMR is robust to different analytical approaches [53].

#### Clinical Validity

High-risk genomic variation in these two regions contributes to disease risk across populations, and multiple phenotypic/genotypic relationships have been established as genetic variation in *CHRNA5* and *CYP2A6* has been associated with increased risk of heavy smoking, increased intensity of smoking, as well as smoking-related disease, and mortality [16,20,22,24,28,29,74]. Examples of the additive effect of these two genes together on heaviness of smoking, dependence and lung cancer are described in further detail in [11] and [29].

Evidence for efficacy testing to improve smoking cessation is less strong, as most has relied on retrospective analyses of trials not adequately powered for pharmacogenomic assessment. As previously mentioned, one prospective controlled trial tested smoking cessation pharmacotherapy response based on nicotine metabolism and showed differential responses to pharmacological treatment between varenicline and nicotine patch based on nicotine metabolism rate; faster metabolizers presented better outcomes on varenicline than the patch, relative to slower metabolizers who presented greater side effects on varenicline [67]. This work will need to be replicated and extended to different ethnicities and types of smokers (including, for example, populations of light smokers, pregnant smokers, e-cigarette users, and individuals with comorbid psychiatric disorders). Nonetheless, the overall body of knowledge about disease risk suggests that testing of both of these genomic regions may have clinical validity.

#### Clinical Utility

The existing evidence for clinical utility is more modest. The gold standard of clinical utility is the evaluation of results from prospective trials that randomize participants to genomic testing or no

genomic testing to compare genomically informed treatments with usual care [75]. Genomic risk scores are stable over a lifetime, but one significant limitation for the use of NMR is the requirement of recent smoking (cotinine levels need to be in steady state). Pragmatic trials, which undertake a practical approach to test genomically informed interventions for smoking cessation integrated into routine medical care, will provide the greatest information about clinical utility [76,77]. The costs, economic benefits, and extent to which the probabilities of smoking-related behaviors and diseases generated from genomic test results are actionable and changeable in clinical and community settings remains uncertain. We deem clinical utility for these genomic applications targeted on smoking cessation to be unknown, and future research should focus on robustly addressing questions of clinical utility.

#### Ethical, Legal, and Social Implications (ELSI)

Genomic testing raises ethical, legal, and social concerns regarding stigmatization, discrimination, and confidentiality. Insufficient work to date has been undertaken to address these important issues when conducting individual genomic tests related to smoking behaviors.

#### Applications of Genomic Testing for Smoking

Significant advances in understanding the genomic variation that underlies smoking behavior have been made, including, as discussed, the well-validated association of *CHRNA5* and *CYP2A6* genomic variation with heavy smoking and smoking-related diseases. Ultimately, this considerable body of evidence should be translated into practical genomic applications that can be integrated routinely in clinical and community settings. We envision at least three applications in which the field of behavioral medicine could apply genomics-informed testing to address smoking behaviors and smoking-related diseases based on *CHRNA5* and *CYP2A6* genomic variation.

#### Risk Stratification in Individuals Who Smoke

Although all individuals who smoke are at increased risk for smoking-related diseases, genomic variation in *CHRNA5* and *CYP2A6* alters this risk beyond the measurement of cigarettes smoked per day [78,79]. **Risk stratification**, a goal of precision medicine, incorporates genomic information at an individual level to predict risk for lung cancer, chronic obstructive pulmonary disease, and early mortality [24,80–82]. Incorporating this genomic information in patient care may prioritize treatment efforts such as more intensive interventions for smoking cessation as well as disease screening (e.g., lung cancer screening). Delivering personalized genomic health information directly to individuals is important in its own right to empower personal health-related decision making. This effort is well aligned with patient-centered approaches to healthcare and participant-centered research initiatives such as All of Us (<https://allofus.nih.gov>), the NIH effort to accelerate research and improve health by taking into account individual differences in lifestyle, environment, and genomics. We posit that testing of *CHRNA5* and *CYP2A6* genomic variation to predict heaviness of smoking and augment risk stratification for lung cancer and other smoking-related lung diseases constitutes the strongest evidence base and carries the highest readiness for implementation.

#### Precision Treatment for Smoking Cessation

Using *CHRNA5* and *CYP2A6* results to identify individuals at higher risk of difficulty with smoking cessation and to potentially guide smoking cessation interventions is a promising area for further investigation. The clinical use of genomic results to inform and optimize smoking cessation pharmacotherapy will reflect an important application in the context of precision medicine. Genomic information on *CHRNA5* and *CYP2A6* can predict an elevated risk of unsuccessful smoking cessation and an increased need for pharmacotherapy (i.e., nicotine replacement therapy, varenicline, and bupropion) as well as counseling [10,11,51,58].

Genomic variation in these two genes may inform the differential selection of smoking cessation pharmacotherapy to yield maximal effectiveness, while limiting excessive adverse events and unnecessary costs. The strongest evidence supporting this rationale relies on findings reporting differing rates of nicotine metabolism that can prospectively predict differential pharmacologic responses [67]. Further research is needed to clarify the potential utility of genomic results on effectiveness for smoking cessation as well as determining the possible side effects to smoking cessation medications. Another area of needed research is the development of biomarkers to predict who may relapse back to smoking after quitting.

### Motivating Behavior Change

The return of genomic test results for *CHRNA5* and *CYP2A6* variation directly to the consumer, or in coordination with a health care provider, is potentially a motivator for smoking cessation. As a tangible example, personalized genomic profiles that communicate disease risk for lung cancer and other lung diseases, based on smoking histories as well as *CHRNA5* and *CYP2A6* genomic results, could be given to individuals who smoke [83]. The majority of individuals report interest in receiving personal genomic risk results for many diseases and recognize the importance of both behavioral and genomic factors that contribute to illness [84,85]. Studies that have examined the return of genomic information to alter smoking behaviors have not shown increased smoking cessation [86,87]. However, these studies have not tested genomic variation that is directly related to smoking behaviors and pharmacological response to treatment such as variation in *CHRNA5* and *CYP2A6* [86,88]. Only one small study has returned genomic information about *CHRNA5* variation and smoking risks and this study did find increased cessation among smokers [83]. The future of precision medicine will include the return of genomic information to individuals. Although this specific use of genomic information clearly has the weakest supporting evidence base to change smoking behavior, it nevertheless, deserves further investigation as our knowledge regarding genomic contributions to smoking behaviors and smoking-related diseases grows.

### Concluding Remarks

Genomic variations in *CHRNA5* and *CYP2A6* are currently the only genomic targets nearing entry into clinical medicine for smoking, particularly in the tailoring of smoking cessation. Variation in these genes causes differences in smoking behaviors across world populations. Despite diverse genomic backgrounds, the association between *CHRNA5* and *CYP2A6* genomic variation and smoking-related behaviors is seen in populations of European, Asian, and African ancestry [35–37]. These genomic biomarkers have analytical validity – as they can be accurately and reliably measured, as well as clinical validity – as they have been unequivocally associated with heaviness of smoking and risk of smoking-related diseases [13,16,18–20,22,25,28,30,37,43,89]. Evidence of clinical utility continues to grow [64,67,83]; these biomarkers can be used to predict smoking cessation difficulty and potential response to smoking cessation pharmacotherapy, and initial evidence suggests that return of these genomic results may motivate smoking cessation [84,85]. However, the need remains to better define the potential utility of integrating genomic advances to change smoking behavior and reduce cigarette smoking (see Outstanding Questions and Box 1). The ethical, legal, and social implications of genomic testing for smoking behaviors remain undefined. Large research consortia such as GSCAN (<https://gscan.sph.umich.edu/>), the GWAS & Sequencing Consortium of Alcohol and Nicotine Use, will define many more genomic regions associated with smoking behaviors in the upcoming year [90]. At this point, we argue that we must continue to test these two (and other yet-to-be defined) genes in relation to clinical utility for smoking-related outcomes to increase the state of readiness for the implementation of genomic applications to smoking behaviors.

### Outstanding Questions

Does providing genomic risk results for *CHRNA5* and *CYP2A6* to individuals who smoke cigarettes motivate smoking cessation?

Will providing genomic risk results for *CHRNA5* and *CYP2A6* motivate the prescription of pharmacotherapy for smoking cessation by health care providers?

Will providing genomic risk results for *CHRNA5* and *CYP2A6* motivate the use of pharmacotherapy for smoking cessation by individuals who smoke?

Can genomic variation in *CHRNA5* and *CYP2A6* predict responses to smoking cessation pharmacotherapy?

How do we address issues of stigmatization, discrimination, privacy, and confidentiality associated with genomic testing for smoking behaviors?

What are the economic and time costs associated with integrating genomic applications for smoking cessation into routine medical care?

**Box 1. Clinician's Corner**

Although clinicians use self-reported cigarettes smoked per day integrated over a lifetime history of smoking to estimate health risks for many smoking-related illnesses, number of cigarettes smoked does not fully capture the behavior of cigarette smoking. For the same number of cigarettes smoked, differences in the number of puffs inhaled per cigarette as well as the depth of inhalation can be profound. These differences lead to differential risk for smoking-related diseases such as lung cancer.

Genomic variation in two genes that are associated with smoking behaviors (*CHRNA5* and *CYP2A6*) alters risk for smoking-related diseases beyond the measurement of cigarettes smoked per day. This genomic information may be used to prioritize care management efforts such as increased efforts at smoking cessation as well as disease screening (e.g., for lung cancer).

There are three FDA-approved medications for smoking cessation: nicotine replacement therapy, varenicline, and bupropion. In the future, it might be possible to use genomic variation in two key genes, *CHRNA5* and *CYP2A6*, to predict which patients will be more successful at stopping smoking with these medications.

With the advent of direct-to-consumer genotyping services such as 23andMe, individuals have access to their genetic health information. It is only a matter of time before genomic information may become routinely used in clinical care. Physicians need to prepare for this change and consider the best practices for incorporating genomic information into clinical settings and for sharing genetic results with patients.

**Disclaimer Statement**

Laura J. Bierut is listed as an inventor on Issued U.S. Patent 8,080,371, "Markers for Addiction" covering the use of certain SNPs in determining the diagnosis, prognosis, and treatment of addiction. R.F. Tyndale has consulted with Apotex and Quinn Emanuel on unrelated issues.

**Acknowledgments**

L.J. is supported by National Institute on Drug Abuse grant R01DA036583. R.F. Tyndale is supported by the Centre for Addiction and Mental Health, a Canada Research Chair in Pharmacogenomics and Canadian Institutes of Health Research FDN-154294.

**References**

- Centers for Disease Control (2016) Current cigarette smoking among adults – United States, 2005–2015. *MMWR Morb. Mortal. Wkly. Rep.* 65, 1205–1211
- U.S. Department of Health and Human Services (2014) *The Health Consequences of Smoking – 50 Years of Progress: A Report of the Surgeon General*. U.S. Department of Health and Human Services, Centers for Disease Control and Prevention, National Center for Chronic Disease Prevention and Health Promotion, Offices on Smoking and Health
- Institute of Medicine (2007) *Ending the Tobacco Problem: A Blueprint for the Nation*, National Academies Press
- Centers for Disease Control (2017) Quitting smoking among adults – United States, 2000–2015. *MMWR Morb. Mortal. Wkly. Rep.* 65, 1457–1464
- Heatherton, T.F. *et al.* (1989) Measuring the heaviness of smoking: using self-reported time to the first cigarette of the day and number of cigarettes smoked per day. *Br. J. Addict.* 84, 791–799
- Doll, R. *et al.* (2004) Mortality in relation to smoking: 50 years' observations on male British doctors. *BMJ* 328, 1519
- Fagerstrom, K.O. (1978) Measuring degree of physical dependence to tobacco smoking with reference to individualization of treatment. *Addict. Behav.* 3, 235–241
- Benowitz, N.L. *et al.* (1983) Smokers of low-yield cigarettes do not consume less nicotine. *N. Engl. J. Med.* 309, 139–142
- Benowitz, N.L. *et al.* (1986) Reduced tar, nicotine, and carbon monoxide exposure while smoking ultralow- but not low-yield cigarettes. *JAMA* 256, 241–246
- Chen, L.S. *et al.* (2012) Interplay of genetic risk factors (*CHRNA5-CHRNA3-CHRNB4*) and cessation treatments in smoking cessation success. *Am. J. Psychiatry* 169, 735–742
- Chen, L.S. *et al.* (2014) Pharmacotherapy effects on smoking cessation vary with nicotine metabolism gene (*CYP2A6*). *Addiction* 109, 128–137
- Chen, L.S. *et al.* (2015) Genetic variation (*CHRNA5*), medication (combination nicotine replacement therapy vs. varenicline), and smoking cessation. *Drug Alcohol Depend.* 154, 278–282
- Chen, L.S. *et al.* (2015) *CHRNA5* risk variant predicts delayed smoking cessation and earlier lung cancer diagnosis – a meta-analysis. *J. Natl. Cancer Inst.* 107, djv100
- Bierut, L.J. *et al.* (2007) Novel genes identified in a high-density genome wide association study for nicotine dependence. *Hum. Mol. Genet.* 16, 24–35
- Saccone, S.F. *et al.* (2007) Cholinergic nicotinic receptor genes implicated in a nicotine dependence association study targeting 348 candidate genes with 3713 SNPs. *Hum. Mol. Genet.* 16, 36–49
- Amos, C.I. *et al.* (2008) Genome-wide association scan of tag SNPs identifies a susceptibility locus for lung cancer at 15q25.1. *Nat. Genet.* 40, 616–622
- Hung, R.J. *et al.* (2008) A susceptibility locus for lung cancer maps to nicotinic acetylcholine receptor subunit genes on 15q25. *Nature* 452, 633–637
- Pillai, S.G. *et al.* (2009) A genome-wide association study in chronic obstructive pulmonary disease (COPD): identification of two major susceptibility loci. *PLoS Genet.* 5, e1000421



19. Saccone, N.L. *et al.* (2010) Multiple independent loci at chromosome 15q25.1 affect smoking quantity: a meta-analysis and comparison with lung cancer and COPD. *PLoS Genet.* 6, e1001053
20. Thorgeirsson, T.E. *et al.* (2008) A variant associated with nicotine dependence, lung cancer and peripheral arterial disease. *Nature* 452, 638–642
21. Timofeeva, M.N. *et al.* (2012) Influence of common genetic variation on lung cancer risk: meta-analysis of 14 900 cases and 29 485 controls. *Hum. Mol. Genet.* 21, 4980–4995
22. Tobacco and Genetics Consortium (2010) Genome-wide meta-analyses identify multiple loci associated with smoking behavior. *Nat. Genet.* 42, 441–447
23. Chen, L.S. *et al.* (2016) Genetic risk can be decreased: quitting smoking decreases and delays lung cancer for smokers with high and low CHRNA5 risk genotypes – a meta-analysis. *EBioMedicine* 11, 219–226
24. Joshi, P.K. *et al.* (2016) Variants near CHRNA3/5 and APOE have age- and sex-related effects on human lifespan. *Nat. Commun.* 7, 11174
25. Bloom, A.J. *et al.* (2014) Variants in two adjacent genes, EGLN2 and CYP2A6, influence smoking behavior related to disease risk via different mechanisms. *Hum. Mol. Genet.* 23, 555–561
26. Kubota, T. *et al.* (2006) CYP2A6 polymorphisms are associated with nicotine dependence and influence withdrawal symptoms in smoking cessation. *Pharmacogenomics J.* 6, 115–119
27. Malaiyandi, V. *et al.* (2005) Implications of CYP2A6 genetic variation for smoking behaviors and nicotine dependence. *Clin. Pharmacol. Ther.* 77, 145–158
28. Thorgeirsson, T.E. *et al.* (2010) Sequence variants at CHRN3-CHRNA6 and CYP2A6 affect smoking behavior. *Nat. Genet.* 42, 448–453
29. Wassenaar, C.A. *et al.* (2011) Relationship between CYP2A6 and CHRNA5-CHRNA3-CHRNA4 variation and smoking behaviors and lung cancer risk. *J. Natl. Cancer Inst.* 103, 1342–1346
30. Tyndale, R.F. and Sellers, E.M. (2002) Genetic variation in CYP2A6-mediated nicotine metabolism alters smoking behavior. *Ther. Drug Monit.* 24, 163–171
31. Liu, T. *et al.* (2011) Interaction between heavy smoking and CYP2A6 genotypes on type 2 diabetes and its possible pathways. *Eur. J. Endocrinol.* 165, 961–967
32. Liu, T. *et al.* (2012) Relationship between amounts of daily cigarette consumption and abdominal obesity moderated by CYP2A6 genotypes in Chinese male current smokers. *Ann. Behav. Med.* 43, 253–261
33. Liu, T. *et al.* (2013) Association between daily cigarette consumption and hypertension moderated by CYP2A6 genotypes in Chinese male current smokers. *J. Hum. Hypertens.* 27, 24–30
34. Berrettini, W. *et al.* (2008) Alpha-5/alpha-3 nicotinic receptor subunit alleles increase risk for heavy smoking. *Mol. Psychiatry* 13, 368–373
35. David, S.P. *et al.* (2012) Genome-wide meta-analyses of smoking behaviors in African Americans. *Transl. Psychiatry* 2, e119
36. Saccone, N.L. *et al.* (2009) The CHRNA5-CHRNA3-CHRNA4 nicotinic receptor subunit gene cluster affects risk for nicotine dependence in African-Americans and in European-Americans. *Cancer Res.* 69, 6848–6856
37. Chen, L.S. *et al.* (2012) Smoking and genetic risk variation across populations of European, Asian, and African American ancestry – a meta-analysis of chromosome 15q25. *Genet. Epidemiol.* 36, 340–351
38. Purves, D. *et al.*, eds (2011) *Neuroscience*, Sinauer Associates
39. Bierut, L.J. *et al.* (2008) Variants in nicotinic receptors and risk for nicotine dependence. *Am. J. Psychiatry* 165, 1163–1171
40. Wang, J.C. *et al.* (2009) Risk for nicotine dependence and lung cancer is conferred by mRNA expression levels and amino acid change in CHRNA5. *Hum. Mol. Genet.* 18, 3125–3135
41. Kuryatov, A. *et al.* (2011) Acetylcholine receptor (AChR) alpha5 subunit variant associated with risk for nicotine dependence and lung cancer reduces (alpha4beta2)alpha5 AChR function. *Mol. Pharmacol.* 79, 119–125
42. Park, S.L. *et al.* (2017) Association of CYP2A6 activity with lung cancer incidence in smokers: the multiethnic cohort study. *PLoS One* 12, e0178435
43. Schoedel, K.A. *et al.* (2004) Ethnic variation in CYP2A6 and association of genetically slow nicotine metabolism and smoking in adult Caucasians. *Pharmacogenetics* 14, 615–626
44. Nakajima, M. *et al.* (1996) Role of human cytochrome P4502A6 in C-oxidation of nicotine. *Drug Metab. Dispos.* 1212–1217
45. Nakajima, M. *et al.* (1996) Characterization of CYP2A6 involved in 3'-hydroxylation of cotinine in human liver microsomes. *J. Pharmacol. Exp. Ther.* 277, 1010–1015
46. Chenoweth, M.J. *et al.* (2014) Known and novel sources of variability in the nicotine metabolite ratio in a large sample of treatment-seeking smokers. *Cancer Epidemiol. Biomarkers Prev.* 23, 1773–1782
47. Dempsey, D. *et al.* (2004) Nicotine metabolite ratio as an index of cytochrome P450 2A6 metabolic activity. *Clin. Pharmacol. Ther.* 76, 64–72
48. Benowitz, N.L. *et al.* (2006) Nicotine intake and dose response when smoking reduced-nicotine content cigarettes. *Clin. Pharmacol. Ther.* 80, 703–714
49. Gu, D.F. *et al.* (2000) The use of long PCR to confirm three common alleles at the CYP2A6 locus and the relationship between genotype and smoking habit. *Ann. Hum. Genet.* 64, 383–390
50. Chenoweth, M.J. *et al.* (2013) CYP2A6 slow nicotine metabolism is associated with increased quitting by adolescent smokers. *Pharmacogenet. Genomics* 23, 232–235
51. Patterson, F. *et al.* (2008) Toward personalized therapy for smoking cessation: a randomized placebo-controlled trial of bupropion. *Clin. Pharmacol. Ther.* 84, 320–325
52. Mooney, M.E. *et al.* (2008) Stability of the nicotine metabolite ratio in *ad libitum* and reducing smokers. *Cancer Epidemiol. Biomarkers Prev.* 17, 1396–1400
53. Tanner, J.A. *et al.* (2015) Nicotine metabolite ratio (3-hydroxycotinine/cotinine) in plasma and urine by different analytical methods and laboratories: implications for clinical implementation. *Cancer Epidemiol. Biomarkers Prev.* 24, 1239–1246
54. Baker, T.B. *et al.* (2007) Time to first cigarette in the morning as an index of ability to quit smoking: implications for nicotine dependence. *Nicotine Tob. Res.* 9 (Suppl 4), S555–S570
55. Breslau, N. and Johnson, E.O. (2000) Predicting smoking cessation and major depression in nicotine-dependent smokers. *Am. J. Public Health* 90, 1122–1127
56. Heatherton, T.F. *et al.* (1991) The Fagerstrom Test for Nicotine Dependence: a revision of the Fagerstrom Tolerance Questionnaire. *Br. J. Addict.* 86, 1119–1127
57. Freathy, R.M. *et al.* (2009) A common genetic variant in the 15q24 nicotinic acetylcholine receptor gene cluster (CHRNA5-CHRNA3-CHRNA4) is associated with a reduced ability of women to quit smoking in pregnancy. *Hum. Mol. Genet.* 18, 2922–2927
58. Bergen, A.W. *et al.* (2013) Nicotinic acetylcholine receptor variation and response to smoking cessation therapies. *Pharmacogenet. Genomics* 23, 94–103
59. Sarginson, J.E. *et al.* (2011) Markers in the 15q24 nicotinic receptor subunit gene cluster (CHRNA5-A3-B4) predict severity of nicotine addiction and response to smoking cessation therapy. *Am. J. Med. Genet. B Neuropsychiatr. Genet.* 156B, 275–284
60. Sarginson, J.E. *et al.* (2015) Response to transdermal selegiline smoking cessation therapy and markers in the 15q24 chromosomal region. *Nicotine Tob. Res.* 17, 1126–1133
61. Zhu, A.Z. *et al.* (2014) Association of CHRNA5-A3-B4 SNP rs2036527 with smoking cessation therapy response in African-American smokers. *Clin. Pharmacol. Ther.* 96, 256–265
62. Chenoweth, M.J. and Tyndale, R.F. (2017) Pharmacogenetic optimization of smoking cessation treatment. *Trends Pharmacol. Sci.* 38, 55–66

63. Tyndale, R.F. *et al.* (2015) Lack of associations of CHRNA5-A3-B4 genetic variants with smoking cessation treatment outcomes in Caucasian smokers despite associations with baseline smoking. *PLoS One* 10, e0128109
64. Schuit, E. *et al.* (2017) Pharmacotherapy for smoking cessation: effects by subgroup defined by genetically informed biomarkers. *Cochrane Database Syst. Rev.* 9, CD011823
65. Schnoll, R.A. *et al.* (2009) Nicotine metabolic rate predicts successful smoking cessation with transdermal nicotine: a validation study. *Pharmacol. Biochem. Behav.* 92, 6–11
66. Lerman, C. *et al.* (2006) Nicotine metabolite ratio predicts efficacy of transdermal nicotine for smoking cessation. *Clin. Pharmacol. Ther.* 79, 600–608
67. Lerman, C. *et al.* (2015) Use of the nicotine metabolite ratio as a genetically informed biomarker of response to nicotine patch or varenicline for smoking cessation: a randomised, double-blind placebo-controlled trial. *Lancet Respir. Med.* 3, 131–138
68. Laurie, C.C. *et al.* (2010) Quality control and quality assurance in genotypic data for genome-wide association studies. *Genet. Epidemiol.* 34, 591–602
69. Chenoweth, M.J. *et al.* (2017) Genome-wide association study of a nicotine metabolism biomarker in African American smokers: impact of chromosome 19 genetic influences. *Addiction* Published online September 16, 2017. <http://dx.doi.org/10.1111/add.14032>
70. Loukola, A. *et al.* (2015) A genome-wide association study of a biomarker of nicotine metabolism. *PLoS Genet.* 11, e1005498
71. Tanner, J.A. *et al.* (2017) Novel CYP2A6 diplotypes identified through next-generation sequencing are associated with *in-vitro* and *in-vivo* nicotine metabolism. *Pharmacogenet. Genomics* 28, 7–16
72. Wassenaar, C.A. *et al.* (2016) CYP2A6 genotyping methods and strategies using real-time and end point PCR platforms. *Pharmacogenomics* 17, 147–162
73. Hamilton, D.A. *et al.* (2015) Test-retest reliability and stability of the nicotine metabolite ratio among treatment-seeking smokers. *Nicotine Tob. Res.* 17, 1505–1509
74. Kupiainen, H. *et al.* (2016) CHRNA5/CHRNA3 locus associates with increased mortality among smokers. *COPD* 13, 464–470
75. National Academies of Sciences, Engineering, and Medicine (2017) *An Evidence Framework for Genetic Testing*, National Academies Press
76. Barnish, M.S. and Turner, S. (2017) The value of pragmatic and observational studies in health care and public health. *Pragmat. Obs. Res.* 8, 49–55
77. Dodd, S. *et al.* (2017) A framework for the design, conduct and interpretation of randomised controlled trials in the presence of treatment changes. *Trials* 18, 498
78. Bloom, A.J. *et al.* (2014) Beyond cigarettes per day. A genome-wide association study of the biomarker carbon monoxide. *Ann. Am. Thorac. Soc.* 11, 1003–1010
79. Le Marchand, L. *et al.* (2008) Smokers with the CHRNA lung cancer-associated variants are exposed to higher levels of nicotine equivalents and a carcinogenic tobacco-specific nitrosamine. *Cancer Res.* 68, 9137–9140
80. Chen, L.S. *et al.* (2018) Leveraging genomic data in smoking cessation trials in the era of precision medicine: why and how. *Nicotine Tob. Res.* Published online May 12, 2017. <http://dx.doi.org/10.1093/ntr/ntx097>
81. Chen, L.S. *et al.* (2017) 2017 Pathways to precision medicine in smoking cessation treatments. *Neurosci. Lett.* Published online May 18, 2017. <http://dx.doi.org/10.1016/j.neulet.2016.05.033>
82. Young, R.P. *et al.* (2012) Clinical applications of gene-based risk prediction for lung cancer and the central role of chronic obstructive pulmonary disease. *Front. Genet.* 3, 210
83. Lipkus, I.M. *et al.* (2015) A preliminary exploration of college smokers' reactions to nicotine dependence genetic susceptibility feedback. *Nicotine Tob. Res.* 17, 337–343
84. Olsson, E. *et al.* (2016) Implications of personal genomic testing for health behaviors: the case of smoking. *Nicotine Tob. Res.* 18, 2273–2277
85. Hartz, S.M. *et al.* (2015) Return of individual genetic results in a high-risk sample: enthusiasm and positive behavioral change. *Genet. Med.* 17, 374–379
86. Hollands, G.J. *et al.* (2016) The impact of communicating genetic risks of disease on risk-reducing health behaviour: systematic review with meta-analysis. *BMJ* 352, i1102
87. Marteau, T.M. *et al.* (2010) Trial protocol: using genotype to tailor prescribing of nicotine replacement therapy: a randomised controlled trial assessing impact of communication upon adherence. *BMC Public Health* 10, 680
88. Marteau, T.M. *et al.* (2010) Effects of communicating DNA-based disease risk estimates on risk-reducing behaviours. *Cochrane Database Syst. Rev.* CD007275
89. Liu, J.Z. *et al.* (2010) Meta-analysis and imputation refines the association of 15q25 with smoking quantity. *Nat. Genet.* 42, 436–440
90. Jiang, Y. (2017) GWAS meta-analysis identifies > 200 novel loci for smoking and drinking addiction. *American Society of Human Genetics Annual Meeting*, Orlando, FL
